# Supplementary material for: How firearm legislation impacts firearm mortality internationally: A scoping review
Source: PubMed Central journal article supplement — Health Policy Open. 2024 Aug 17;7:100127. doi: 10.1016/j.hpopen.2024.100127 (PMC11381453; doi:10.1016/j.hpopen.2024.100127), 2024-08-17
Supplement: mmc1.pdf [file mmc1.pdf]

## **TABLE OF CONTENTS**

| <b>APPENDIX</b>   | <b>DETAILS</b>          | <b>PAGE</b> |
|-------------------|-------------------------|-------------|
| <b>APPENDIX 1</b> | PRISMA-SCR CHECKLIST    | 1           |
| <b>APPENDIX 2</b> | SEARCH STRATEGY         | 4           |
| <b>APPENDIX 3</b> | GREY LITERATURE SOURCES | 16          |
| <b>APPENDIX 4</b> | CRITICAL APPRAISAL      | 18          |
| <b>APPENDIX 5</b> | STUDY CHARACTERISTICS   | 19          |

## Appendix 1: PRISMA-ScR Checklist

| SECTION                           | ITEM | PRISMA-ScR CHECKLIST ITEM                                                                                                                                                                                                                                                                                  | REPORTED ON PAGE # |
|-----------------------------------|------|------------------------------------------------------------------------------------------------------------------------------------------------------------------------------------------------------------------------------------------------------------------------------------------------------------|--------------------|
| <b>TITLE</b>                      |      |                                                                                                                                                                                                                                                                                                            |                    |
| Title                             | 1    | Identify the report as a scoping review.                                                                                                                                                                                                                                                                   | 1                  |
| <b>ABSTRACT</b>                   |      |                                                                                                                                                                                                                                                                                                            |                    |
| Structured summary                | 2    | Provide a structured summary that includes (as applicable): background, objectives, eligibility criteria, sources of evidence, charting methods, results, and conclusions that relate to the review questions and objectives.                                                                              | 2                  |
| <b>INTRODUCTION</b>               |      |                                                                                                                                                                                                                                                                                                            |                    |
| Rationale                         | 3    | Describe the rationale for the review in the context of what is already known. Explain why the review questions/objectives lend themselves to a scoping review approach.                                                                                                                                   | 3                  |
| Objectives                        | 4    | Provide an explicit statement of the questions and objectives being addressed with reference to their key elements (e.g., population or participants, concepts, and context) or other relevant key elements used to conceptualize the review questions and/or objectives.                                  | 3                  |
| <b>METHODS</b>                    |      |                                                                                                                                                                                                                                                                                                            |                    |
| Protocol and registration         | 5    | Indicate whether a review protocol exists; state if and where it can be accessed (e.g., a Web address); and if available, provide registration information, including the registration number.                                                                                                             | 3                  |
| Eligibility criteria              | 6    | Specify characteristics of the sources of evidence used as eligibility criteria (e.g., years considered, language, and publication status), and provide a rationale.                                                                                                                                       | 4                  |
| Information sources*              | 7    | Describe all information sources in the search (e.g., databases with dates of coverage and contact with authors to identify additional sources), as well as the date the most recent search was executed.                                                                                                  | 4                  |
| Search                            | 8    | Present the full electronic search strategy for at least 1 database, including any limits used, such that it could be repeated.                                                                                                                                                                            | 4                  |
| Selection of sources of evidence† | 9    | State the process for selecting sources of evidence (i.e., screening and eligibility) included in the scoping review.                                                                                                                                                                                      | 4, Appendix 2      |
| Data charting process‡            | 10   | Describe the methods of charting data from the included sources of evidence (e.g., calibrated forms or forms that have been tested by the team before their use, and whether data charting was done independently or in duplicate) and any processes for obtaining and confirming data from investigators. | 4                  |

| SECTION                                               | ITEM | PRISMA-ScR CHECKLIST ITEM                                                                                                                                                                             | REPORTED ON PAGE # |
|-------------------------------------------------------|------|-------------------------------------------------------------------------------------------------------------------------------------------------------------------------------------------------------|--------------------|
| Data items                                            | 11   | List and define all variables for which data were sought and any assumptions and simplifications made.                                                                                                | 4                  |
| Critical appraisal of individual sources of evidence§ | 12   | If done, provide a rationale for conducting a critical appraisal of included sources of evidence; describe the methods used and how this information was used in any data synthesis (if appropriate). | 4                  |
| Synthesis of results                                  | 13   | Describe the methods of handling and summarizing the data that were charted.                                                                                                                          | 5                  |
| <b>RESULTS</b>                                        |      |                                                                                                                                                                                                       |                    |
| Selection of sources of evidence                      | 14   | Give numbers of sources of evidence screened, assessed for eligibility, and included in the review, with reasons for exclusions at each stage, ideally using a flow diagram.                          | 6                  |
| Characteristics of sources of evidence                | 15   | For each source of evidence, present characteristics for which data were charted and provide the citations.                                                                                           | 7, Appendix 5      |
| Critical appraisal within sources of evidence         | 16   | If done, present data on critical appraisal of included sources of evidence (see item 12).                                                                                                            | Appendix 4         |
| Results of individual sources of evidence             | 17   | For each included source of evidence, present the relevant data that were charted that relate to the review questions and objectives.                                                                 | Appendix 5         |
| Synthesis of results                                  | 18   | Summarize and/or present the charting results as they relate to the review questions and objectives.                                                                                                  | 5                  |
| <b>DISCUSSION</b>                                     |      |                                                                                                                                                                                                       |                    |
| Summary of evidence                                   | 19   | Summarize the main results (including an overview of concepts, themes, and types of evidence available), link to the review questions and objectives, and consider the relevance to key groups.       | 14                 |
| Limitations                                           | 20   | Discuss the limitations of the scoping review process.                                                                                                                                                | 16                 |
| Conclusions                                           | 21   | Provide a general interpretation of the results with respect to the review questions and objectives, as well as potential implications and/or next steps.                                             | 16                 |
| <b>FUNDING</b>                                        |      |                                                                                                                                                                                                       |                    |
| Funding                                               | 22   | Describe sources of funding for the included sources of evidence, as well as sources of funding for the scoping review. Describe the role of the funders of the scoping review.                       | 5                  |

JBIG = Joanna Briggs Institute; PRISMA-ScR = Preferred Reporting Items for Systematic reviews and Meta-Analyses extension for Scoping Reviews.

\* Where *sources of evidence* (see second footnote) are compiled from, such as bibliographic databases, social media platforms, and Web sites.

† A more inclusive/heterogeneous term used to account for the different types of evidence or data sources (e.g., quantitative and/or qualitative research, expert opinion, and policy documents) that may be eligible in a scoping review as opposed to only studies. This is not to be confused with *information sources* (see first footnote).

‡ The frameworks by Arksey and O'Malley (6) and Levac and colleagues (7) and the JBI guidance (4, 5) refer to the process of data extraction in a scoping review as data charting.

§ The process of systematically examining research evidence to assess its validity, results, and relevance before using it to inform a decision. This term is used for items 12 and 19 instead of "risk of bias" (which is more applicable to systematic reviews of interventions) to include and acknowledge the various sources of evidence that may be used in a scoping review (e.g., quantitative and/or qualitative research, expert opinion, and policy document).

*From:* Tricco AC, Lillie E, Zarin W, O'Brien KK, Colquhoun H, Levac D, et al. PRISMA Extension for Scoping Reviews (PRISMA-ScR): Checklist and Explanation. *Ann Intern Med.* 2018;169:467–473. [doi: 10.7326/M18-0850](https://doi.org/10.7326/M18-0850).

## Appendix 2: Search strategy

Firearms Legislation  
Initial Search  
2021 Nov 4

Ovid Multifile

Database: Embase Classic+Embase <1947 to 2021 November 03>, Ovid MEDLINE(R) ALL <1946 to November 03, 2021>, APA PsycInfo <1806 to November Week 1 2021>

Search Strategy:

- 
- 1 Firearms/ (13538)
  - 2 (firearm? or fire arm? or gun or guns or handgun? or hand-gun? or longgun? or long-gun? or pistol? or revolver? or automatic weapon? or semiautomatic weapon? or semi-automatic weapon? or shotgun? or shot-gun? or rifle?).tw,kw,kf. (65443)
  - 3 or/1-2 [FIREARMS] (68648)
  - 4 exp Homicide/ (52744)
  - 5 (homicide\* or kill or killed or kills or killing\* or murder\* or wrongful death\* or slay\* or (fatal\* adj3 assault\*) or (fatal\* adj3 attack\*) or (fatal\* adj3 attempt\*) or (fatal\* adj3 intent\*) or (dead\* adj3 assault\*) or (dead\* adj3 attack\*) or (dead\* adj3 attempt\*) or (dead\* adj3 intent\*) or (death\* adj3 assault\*) or (death\* adj3 attack\*) or (death\* adj3 attempt\*) or (death\* adj3 intent\*) or (mortal\* adj3 assault\*) or (mortal\* adj3 attack\*) or (mortal\* adj3 attempt\*) or (mortal\* adj3 intent\*)).tw,kw,kf. (421852)
  - 6 femicide\*.tw,kw,kf. (519)
  - 7 Suicide/ (135121)
  - 8 Suicide, Completed/ (64627)
  - 9 suicid\*.tw,kw,kf. (270248)
  - 10 Mass Casualty Incidents/ (5024)
  - 11 shooting\*.tw,kw,kf. (14910)
  - 12 Domestic Violence/ and (Death/ or (dead\* or death\* or fatal\* or mortal\*).tw,kw,kf.) (1407)
  - 13 Spouse Abuse/ and (Death/ or (dead\* or death\* or fatal\* or mortal\*).tw,kw,kf.) (896)
  - 14 Intimate Partner Violence/ and (Death/ or (dead\* or death\* or fatal\* or mortal\*).tw,kw,kf.) (1001)
  - 15 (((partner\* or spouse\* or spousal\* or boyfriend? or girlfriend? or wife or wives or wom#n\* or female? or dating or domestic\* or intimate or marital\* or marriage\* or married\*) adj3 (assault\* or attack\* or brutal\* or violen\*)) and (dead\* or death\* or fatal\* or mortal\*)).tw,kw,kf. (4073)
  - 16 ((partner\* or spouse\* or spousal\* or boyfriend? or girlfriend? or wife or wives or wom#n\* or female? or dating or domestic\* or intimate or marital\* or marriage\* or married\*) adj3 (assault\* or attack\* or brutal\* or violen\*)).tw,kw,kf. and Death/ (212)
  - 17 or/4-16 [HOMICIDE, FEMICIDE, SUICIDE, ETC] (740804)
  - 18 3 and 17 [FIREARMS - HOMICIDE, FEMICIDE, SUICIDE, ETC] (12995)
  - 19 Gun Violence/ and (Death/ or (dead\* or death\* or fatal\* or mortal\*).tw,kw,kf.) (360)
  - 20 ((firearm? or fire arm? or gun or guns or handgun? or hand-gun? or longgun? or long-gun? or pistol? or revolver? or automatic weapon? or semiautomatic weapon? or semi-automatic weapon? or shotgun? or shot-gun? or rifle?) adj5 (dead\* or death\* or fatal\* or mortal\*)).tw,kw,kf. (3393)
  - 21 (firearm? or fire arm? or gun or guns or handgun? or hand-gun? or longgun? or long-gun? or pistol? or revolver? or automatic weapon? or semiautomatic weapon? or semi-automatic weapon? or shotgun? or shot-gun? or rifle?).tw,kw,kf. and Death/ (692)
  - 22 or/19-21 [GUN VIOLENCE/DEATH] (4047)
  - 23 18 or 22 [FIREARMS - HOMICIDE, ETC, GUN VIOLENCE/DEATH] (14816)
  - 24 Legislation/ (100716)

25 Legislation as Topic/ (115040)  
 26 lj.fs. [Legislation & Jurisprudence] (259326)  
 27 Policy/ (98094)  
 28 Policy Making/ (92218)  
 29 Public Policy/ (59974)  
 30 Politics/ (134321)  
 31 Social Control Policies/ (16299)  
 32 Social Control, Formal/ (27420)  
 33 Criminal Law/ (14264)  
 34 exp Government/ (326526)  
 35 Law Enforcement/ (20130)  
 36 Government Regulation/ (49638)  
 37 (control\* or criminalis\* or criminaliz\* or decriminali\* or de-criminali\* or depenali\* or de-penali\* or deregulat\* or de-regulat\* or enforc\* or government\* or law or laws or legal\* or legislat\* or liberali\* or ordinance? or penaliz\* or penalis\* or police or policing or policy or policies or politic\* or regulat\* or statute?).tw,kw,kf. (15717773)  
 38 Jurisprudence/ (60945)  
 39 (jurispruden\* or judicial\* or justice\*).tw,kw,kf. (123622)  
 40 Licensure/ (32208)  
 41 (licenc\* or licens\* or permit or permits or "permission? to carry").tw,kw,kf. (528537)  
 42 (ERPO or ERPOs or EPO or EPOs or EIO or EIOs or red flag? or yellow flag?).tw,kw,kf. (38200)  
 43 (Bill C-21 or Bill C21 or Bill C-71 or Bill C71 or "Anastasia's Law").tw,kw,kf. (0)  
 44 or/24-43 [LEGISLATION] (16700986)  
 45 23 and 44 [FIREARMS - HOMICIDE, ETC, GUN VIOLENCE] (6481)  
 46 exp Animals/ not Humans/ (18270512)  
 47 45 not 46 [ANIMAL-ONLY REMOVED] (5600)  
 48 47 use medall [MEDLINE RECORDS] (2329)  
 49 exp firearm/ (13863)  
 50 (firearm? or fire arm? or gun or guns or handgun? or hand-gun? or longgun? or long-gun? or pistol? or revolver? or automatic weapon? or semiautomatic weapon? or semi-automatic weapon? or shotgun? or shot-gun? or rifle?).tw,kw,kf. (65443)  
 51 or/49-50 [FIREARMS] (68748)  
 52 homicide/ (39826)  
 53 (homicide\* or kill or killed or kills or killing\* or murder\* or wrongful death\* or slay\* or (fatal\* adj3 assault\*) or (fatal\* adj3 attack\*) or (fatal\* adj3 attempt\*) or (fatal\* adj3 intent\*) or (dead\* adj3 assault\*) or (dead\* adj3 attack\*) or (dead\* adj3 attempt\*) or (dead\* adj3 intent\*) or (death\* adj3 assault\*) or (death\* adj3 attack\*) or (death\* adj3 attempt\*) or (death\* adj3 intent\*) or (mortal\* adj3 assault\*) or (mortal\* adj3 attack\*) or (mortal\* adj3 attempt\*) or (mortal\* adj3 intent\*)).tw,kw,kf. (421852)  
 54 femicide\*.tw,kw,kf. (519)  
 55 suicide/ (135121)  
 56 suicid\*.tw,kw,kf. (270248)  
 57 shooting\*.tw,kw,kf. (14910)  
 58 domestic violence/ and (death/ or fatality/ or lethality/ or (dead\* or death\* or fatal\* or mortal\*).tw,kw,kf.) (1417)  
 59 partner violence/ and (death/ or fatality/ or lethality/ or (dead\* or death\* or fatal\* or mortal\*).tw,kw,kf.) (899)  
 60 (((partner\* or spouse\* or spousal\* or boyfriend? or girlfriend? or wife or wives or wom#n\* or female? or dating or domestic\* or intimate or marital\* or marriage\* or married\*) adj3 (assault\* or attack\* or brutal\* or violen\*)) and (dead\* or death\* or fatal\* or mortal\*)).tw,kw,kf. (4073)

61 ((partner\* or spouse\* or spousal\* or boyfriend? or girlfriend? or wife or wives or wom#n\* or female? or dating or domestic\* or intimate or marital\* or marriage\* or married\*) adj3 (assault\* or attack\* or brutal\* or violent\*).tw,kw,kf. and (death/ or fatality/ or lethality/) (310)

62 or/52-61 [HOMICIDE, FEMICIDE, SUICIDE, ETC] (726527)

63 51 and 62 [FIREARMS - HOMICIDE, FEMICIDE, SUICIDE, ETC] (12907)

64 gun violence/ and (death/ or fatality/ or lethality/ or (dead\* or death\* or fatal\* or mortal\*).tw,kw,kf.) (368)

65 ((firearm? or fire arm? or gun or guns or handgun? or longgun? or pistol? or revolver? or automatic weapon? or semiautomatic weapon? or semi-automatic weapon? or shotgun? or rifle?) adj5 (dead\* or death\* or fatal\* or mortal\*).tw,kw,kf. (3393)

66 (firearm? or fire arm? or gun or guns or handgun? or longgun? or pistol? or revolver? or automatic weapon? or semiautomatic weapon? or semi-automatic weapon? or shotgun? or rifle?).tw,kw,kf. and (death/ or fatality/ or lethality/) (1259)

67 or/64-66 [GUN VIOLENCE/DEATH] (4415)

68 63 or 67 [FIREARMS - HOMICIDE, ETC, GUN VIOLENCE/DEATH] (14882)

69 policy/ (98094)

70 public policy/ (59974)

71 politics/ (134321)

72 social control/ (30205)

73 law/ (128987)

74 criminal law/ (14264)

75 government/ (187055)

76 law enforcement/ (20130)

77 government regulation/ (49638)

78 (control\* or criminalis\* or criminaliz\* or decriminali\* or de-criminali\* or depenali\* or de-penali\* or deregulat\* or de-regulat\* or enforc\* or government\* or law or laws or legal\* or legislat\* or liberali\* or ordinance? or penaliz\* or penalis\* or police or policing or policy or policies or politic\* or regulat\* or statute?).tw,kw,kf. (15717773)

79 jurisprudence/ (60945)

80 (jurispruden\* or judicial\* or justice\*).tw,kw,kf. (123622)

81 licensing/ (33354)

82 (licenc\* or licens\* or permit or permits or "permission? to carry").tw,kw,kf. (528537)

83 (ERPO or ERPOs or EPO or EPOs or EIO or EIOs or red flag? or yellow flag?).tw,kw,kf. (38200)

84 (Bill C-21 or Bill C21 or Bill C-71 or Bill C71 or "Anastasia's Law").tw,kw,kf. (0)

85 or/69-84 [LEGISLATION] (16456593)

86 68 and 85 [FIREARMS - HOMICIDE, ETC, GUN VIOLENCE] (6184)

87 exp animal/ or exp animal experimentation/ or exp animal model/ or exp animal experiment/ or nonhuman/ or exp vertebrate/ (56976701)

88 exp human/ or exp human experimentation/ or exp human experiment/ (44142298)

89 87 not 88 (12836297)

90 86 not 89 [ANIMAL-ONLY REMOVED] (6042)

91 conference abstract.pt. (4243056)

92 90 not 91 [CONFERENCE ABSTRACTS REMOVED] (5800)

93 92 use emczd [EMBASE RECORDS] (2510)

94 Firearms/ (13538)

95 (firearm? or fire arm? or gun or guns or handgun? or hand-gun? or longgun? or long-gun? or pistol? or revolver? or automatic weapon? or semiautomatic weapon? or semi-automatic weapon? or shotgun? or shot-gun? or rifle?).tw,id. (64046)

96 or/94-95 [FIREARMS] (67333)

97 exp Homicide/ (52744)

98 (homicide\* or kill or killed or kills or killing\* or murder\* or wrongful death\* or slay\* or (fatal\* adj3 assault\*) or (fatal\* adj3 attack\*) or (fatal\* adj3 attempt\*) or (fatal\* adj3 intent\*) or (dead\* adj3 assault\*) or (dead\* adj3 attack\*) or (dead\* adj3 attempt\*) or (dead\* adj3 intent\*) or (death\* adj3 assault\*) or (death\* adj3 attack\*) or (death\* adj3 attempt\*) or (death\* adj3 intent\*) or (mortal\* adj3 assault\*) or (mortal\* adj3 attack\*) or (mortal\* adj3 attempt\*) or (mortal\* adj3 intent\*)).tw,id. (420265)

99 femicide\*.tw,id. (487)

100 Suicide/ (135121)

101 suicid\*.tw,id. (267044)

102 Mass Murder/ (304)

103 shooting\*.tw,id. (14729)

104 Domestic Violence/ and (dead\* or death\* or fatal\* or mortal\*).tw,id. (1346)

105 Intimate Partner Violence/ and (dead\* or death\* or fatal\* or mortal\*).tw,id. (979)

106 (((partner\* or spouse\* or spousal\* or boyfriend? or girlfriend? or wife or wives or wom#n\* or female? or dating or domestic\* or intimate or marital\* or marriage\* or married\*) adj3 (assault\* or attack\* or brutal\* or violen\*)) and (dead\* or death\* or fatal\* or mortal\*)).tw,id. (3883)

107 or/97-106 [HOMICIDE, FEMICIDE, SUICIDE, ETC] (732840)

108 96 and 107 [FIREARMS - HOMICIDE, FEMICIDE, SUICIDE, ETC] (12697)

109 Gun Violence/ and (dead\* or death\* or fatal\* or mortal\*).tw,id. (347)

110 ((firearm? or fire arm? or gun or guns or handgun? or longgun? or pistol? or revolver? or automatic weapon? or semiautomatic weapon? or semi-automatic weapon? or shotgun? or rifle?) adj5 (dead\* or death\* or fatal\* or mortal\*)).tw,id. (3327)

111 109 or 110 [GUN VIOLENCE/DEATH] (3492)

112 108 or 111 [FIREARMS - HOMICIDE, ETC, GUN VIOLENCE/DEATH] (14199)

113 Policy Making/ (92218)

114 Politics/ (134321)

115 Social Control/ (30205)

116 Laws/ (47151)

117 Gun Control Laws/ (324)

118 Government/ (187055)

119 Law Enforcement/ (20130)

120 Government Policy Making/ (20983)

121 (control\* or criminalis\* or criminaliz\* or decriminali\* or de-criminali\* or depenali\* or de-penali\* or deregulat\* or de-regulat\* or enforc\* or government\* or law or laws or legal\* or legislat\* or liberali\* or ordinance? or penaliz\* or penalis\* or police or policing or policy or policies or politic\* or regulat\* or statute?).tw,id. (15582644)

122 "Law (Government)"/ (991)

123 (jurispruden\* or judicial\* or justice\*).tw,id. (114444)

124 (licenc\* or licens\* or permit or permits or "permission? to carry").tw,id. (527264)

125 (ERPO or ERPOs or EPO or EPOs or EIO or EIOs or red flag? or yellow flag?).tw,id. (37669)

126 (Bill C-21 or Bill C21 or Bill C-71 or Bill C71 or "Anastasia's Law").tw,id. (0)

127 or/113-126 [LEGISLATION] (16259395)

128 112 and 127 [FIREARMS - HOMICIDE, ETC, GUN VIOLENCE] (5785)

129 128 use medall,emczd (4491)

130 128 not 129 [PSYCINFO RECORDS] (1294)

131 48 or 93 or 130 [ALL DATABASES] (6133)

132 limit 131 to yr="2016-current" (2374)

133 remove duplicates from 132 (1432)

134 131 not 132 (3759)

135 remove duplicates from 134 (2344)

136 133 or 135 [TOTAL UNIQUE RECORDS] (3776)

137 136 use medall [MEDLINE UNIQUE RECORDS] (2276)



138 136 use emezd [EMBASE UNIQUE RECORDS] (683)  
139 136 not (137 or 138) [PSYCINFO UNIQUE RECORDS] (817)

\*\*\*\*\*

PAIS Index

(((((MAINSUBJECT.EXACT("Firearms") OR ti(firearm\* OR "fire arm" OR "fire arms" OR gun OR guns OR handgun\* OR "hand-gun" OR "hand-guns" OR longgun\* OR "long-gun" OR "long guns" OR pistol\* OR revolver\* OR "automatic weapon" OR "automatic weapons" OR "semiautomatic weapon" OR "semiautomatic weapons" OR "semi-automatic weapon" OR "semi-automatic weapons" OR shotgun\* OR "shot-gun" OR "shot-guns" OR rifle\*) OR ab(firearm\* OR "fire arm" OR "fire arms" OR gun OR guns OR handgun\* OR "hand-gun" OR "hand-guns" OR longgun\* OR "long-gun" OR "long guns" OR pistol\* OR revolver\* OR "automatic weapon" OR "automatic weapons" OR "semiautomatic weapon" OR "semiautomatic weapons" OR "semi-automatic weapon" OR "semi-automatic weapons" OR shotgun\* OR "shot-gun" OR "shot-guns" OR rifle\*)) AND (((MAINSUBJECT.EXACT("Massacre") OR MAINSUBJECT.EXACT("Homicide")) OR ti(homicide\* OR kill OR killed OR kills OR killing\* OR murder\* OR "wrongful death" OR "wrongful deaths" OR slay\* OR (fatal\* NEAR/3 assault\*) OR (fatal\* NEAR/3 attack\*) OR (fatal\* NEAR/3 attempt\*) OR (fatal\* NEAR/3 intent\*) OR (dead\* NEAR/3 assault\*) OR (dead\* NEAR/3 attack\*) OR (dead\* NEAR/3 attempt\*) OR (dead\* NEAR/3 intent\*) OR (death\* NEAR/3 assault\*) OR (death\* NEAR/3 attack\*) OR (death\* NEAR/3 attempt\*) OR (death\* NEAR/3 intent\*) OR (mortal\* NEAR/3 assault\*) OR (mortal\* NEAR/3 attack\*) OR (mortal\* NEAR/3 attempt\*) OR (mortal\* NEAR/3 intent\*)) OR ab(homicide\* OR kill OR killed OR kills OR killing\* OR murder\* OR "wrongful death" OR "wrongful deaths" OR slay\* OR (fatal\* NEAR/3 assault\*) OR (fatal\* NEAR/3 attack\*) OR (fatal\* NEAR/3 attempt\*) OR (fatal\* NEAR/3 intent\*) OR (dead\* NEAR/3 assault\*) OR (dead\* NEAR/3 attack\*) OR (dead\* NEAR/3 attempt\*) OR (dead\* NEAR/3 intent\*) OR (death\* NEAR/3 assault\*) OR (death\* NEAR/3 attack\*) OR (death\* NEAR/3 attempt\*) OR (death\* NEAR/3 intent\*) OR (mortal\* NEAR/3 assault\*) OR (mortal\* NEAR/3 attack\*) OR (mortal\* NEAR/3 attempt\*) OR (mortal\* NEAR/3 intent\*)) OR ti(femicide\* OR suicid\* OR shooting\*) OR ab(femicide\* OR suicid\* OR shooting\*)) OR MAINSUBJECT.EXACT("Suicide") OR ((MAINSUBJECT.EXACT("Family Violence") OR MAINSUBJECT.EXACT("Spouse Abuse")) AND MAINSUBJECT.EXACT("Death")) OR (noft(((partner\* OR spouse\* OR spousal\* OR boyfriend\* OR girlfriend\* OR wife OR wives OR woman\* OR women\* OR female? OR dating OR domestic\* OR intimate OR marital\* OR marriage\* OR married\*) NEAR/3 (assault\* OR attack\* OR brutal\* OR violent\*))) AND noft(dead\* OR death\* OR fatal\* OR mortal\*))) OR (noft((firearm\* OR "fire arm" OR "fire arms" OR gun OR guns OR handgun\* OR "hand-gun" OR "hand-guns" OR longgun\* OR "long-gun" OR "long guns" OR pistol\* OR revolver\* OR "automatic weapon" OR "automatic weapons" OR "semiautomatic weapon" OR "semiautomatic weapons" OR "semi-automatic weapon" OR "semi-automatic weapons" OR shotgun\* OR "shot-gun" OR "shot-guns" OR rifle\*)) AND noft(dead\* OR death\* OR fatal\* OR mortal\*))) AND (MAINSUBJECT.EXACT("Legislation") OR (MAINSUBJECT.EXACT("Policy") OR MAINSUBJECT.EXACT("Government Policy")) OR MAINSUBJECT.EXACT("Public Policy") OR MAINSUBJECT.EXACT("Policy Making") OR MAINSUBJECT.EXACT("Politics") OR MAINSUBJECT.EXACT("Social Control") OR (MAINSUBJECT.EXACT("Criminal Law") OR MAINSUBJECT.EXACT("Law")) OR (MAINSUBJECT.EXACT.EXPLODE("Central Government") OR MAINSUBJECT.EXACT("Government") OR MAINSUBJECT.EXACT.EXPLODE("Local Government")) OR MAINSUBJECT.EXACT("Law Enforcement") OR MAINSUBJECT.EXACT("Government Regulation")))) OR (((MAINSUBJECT.EXACT("Firearms") OR ti(firearm\* OR "fire arm" OR "fire arms" OR gun OR guns OR handgun\* OR "hand-gun" OR "hand-guns" OR longgun\* OR "long-gun" OR "long guns" OR pistol\* OR revolver\* OR "automatic weapon" OR "automatic weapons" OR "semiautomatic weapon" OR "semiautomatic weapons" OR "semi-automatic weapon" OR "semi-automatic weapons" OR shotgun\* OR "shot-gun" OR "shot-guns" OR

rifle\*) OR ab(firearm\* OR "fire arm" OR "fire arms" OR gun OR guns OR handgun\* OR "hand-gun" OR "hand-guns" OR longgun\* OR "long-gun" OR "long guns" OR pistol\* OR revolver\* OR "automatic weapon" OR "automatic weapons" OR "semiautomatic weapon" OR "semiautomatic weapons" OR "semi-automatic weapon" OR "semi-automatic weapons" OR shotgun\* OR "shot-gun" OR "shot-guns" OR rifle\*) AND (((MAINSUBJECT.EXACT("Massacre") OR MAINSUBJECT.EXACT("Homicide")) OR ti(homicide\* OR kill OR killed OR kills OR killing\* OR murder\* OR "wrongful death" OR "wrongful deaths" OR slay\* OR (fatal\* NEAR/3 assault\*) OR (fatal\* NEAR/3 attack\*) OR (fatal\* NEAR/3 attempt\*) OR (fatal\* NEAR/3 intent\*) OR (dead\* NEAR/3 assault\*) OR (dead\* NEAR/3 attack\*) OR (dead\* NEAR/3 attempt\*) OR (dead\* NEAR/3 intent\*) OR (death\* NEAR/3 assault\*) OR (death\* NEAR/3 attack\*) OR (death\* NEAR/3 attempt\*) OR (death\* NEAR/3 intent\*) OR (mortal\* NEAR/3 assault\*) OR (mortal\* NEAR/3 attack\*) OR (mortal\* NEAR/3 attempt\*) OR (mortal\* NEAR/3 intent\*)) OR ab(homicide\* OR kill OR killed OR kills OR killing\* OR murder\* OR "wrongful death" OR "wrongful deaths" OR slay\* OR (fatal\* NEAR/3 assault\*) OR (fatal\* NEAR/3 attack\*) OR (fatal\* NEAR/3 attempt\*) OR (fatal\* NEAR/3 intent\*) OR (dead\* NEAR/3 assault\*) OR (dead\* NEAR/3 attack\*) OR (dead\* NEAR/3 attempt\*) OR (dead\* NEAR/3 intent\*) OR (death\* NEAR/3 assault\*) OR (death\* NEAR/3 attack\*) OR (death\* NEAR/3 attempt\*) OR (death\* NEAR/3 intent\*) OR (mortal\* NEAR/3 assault\*) OR (mortal\* NEAR/3 attack\*) OR (mortal\* NEAR/3 attempt\*) OR (mortal\* NEAR/3 intent\*)) OR ti(femicide\* OR suicid\* OR shooting\*) OR ab(femicide\* OR suicid\* OR shooting\*)) OR MAINSUBJECT.EXACT("Suicide") OR ((MAINSUBJECT.EXACT("Family Violence") OR MAINSUBJECT.EXACT("Spouse Abuse")) AND MAINSUBJECT.EXACT("Death")) OR (noft(((partner\* OR spouse\* OR spousal\* OR boyfriend\* OR girlfriend\* OR wife OR wives OR woman\* OR women\* OR female? OR dating OR domestic\* OR intimate OR marital\* OR marriage\* OR married\*) NEAR/3 (assault\* OR attack\* OR brutal\* OR violent\*))) AND noft(dead\* OR death\* OR fatal\* OR mortal\*))) OR (noft((firearm\* OR "fire arm" OR "fire arms" OR gun OR guns OR handgun\* OR "hand-gun" OR "hand-guns" OR longgun\* OR "long-gun" OR "long guns" OR pistol\* OR revolver\* OR "automatic weapon" OR "automatic weapons" OR "semiautomatic weapon" OR "semiautomatic weapons" OR "semi-automatic weapon" OR "semi-automatic weapons" OR shotgun\* OR "shot-gun" OR "shot-guns" OR rifle\*)) AND noft(dead\* OR death\* OR fatal\* OR mortal\*)) AND (ti(jurispruden\* OR judicial\* OR justice\*) OR ab(jurispruden\* OR judicial\* OR justice\*)) OR (((MAINSUBJECT.EXACT("Firearms") OR ti(firearm\* OR "fire arm" OR "fire arms" OR gun OR guns OR handgun\* OR "hand-gun" OR "hand-guns" OR longgun\* OR "long-gun" OR "long guns" OR pistol\* OR revolver\* OR "automatic weapon" OR "automatic weapons" OR "semiautomatic weapon" OR "semiautomatic weapons" OR "semi-automatic weapon" OR "semi-automatic weapons" OR shotgun\* OR "shot-gun" OR "shot-guns" OR rifle\*)) OR ab(firearm\* OR "fire arm" OR "fire arms" OR gun OR guns OR handgun\* OR "hand-gun" OR "hand-guns" OR longgun\* OR "long-gun" OR "long guns" OR pistol\* OR revolver\* OR "automatic weapon" OR "automatic weapons" OR "semiautomatic weapon" OR "semiautomatic weapons" OR "semi-automatic weapon" OR "semi-automatic weapons" OR shotgun\* OR "shot-gun" OR "shot-guns" OR rifle\*)) AND (((MAINSUBJECT.EXACT("Massacre") OR MAINSUBJECT.EXACT("Homicide")) OR ti(homicide\* OR kill OR killed OR kills OR killing\* OR murder\* OR "wrongful death" OR "wrongful deaths" OR slay\* OR (fatal\* NEAR/3 assault\*) OR (fatal\* NEAR/3 attack\*) OR (fatal\* NEAR/3 attempt\*) OR (fatal\* NEAR/3 intent\*) OR (dead\* NEAR/3 assault\*) OR (dead\* NEAR/3 attack\*) OR (dead\* NEAR/3 attempt\*) OR (dead\* NEAR/3 intent\*) OR (death\* NEAR/3 assault\*) OR (death\* NEAR/3 attack\*) OR (death\* NEAR/3 attempt\*) OR (death\* NEAR/3 intent\*) OR (mortal\* NEAR/3 assault\*) OR (mortal\* NEAR/3 attack\*) OR (mortal\* NEAR/3 attempt\*) OR (mortal\* NEAR/3 intent\*)) OR ab(homicide\* OR kill OR killed OR kills OR killing\* OR murder\* OR "wrongful death" OR "wrongful deaths" OR slay\* OR (fatal\* NEAR/3 assault\*) OR (fatal\* NEAR/3 attack\*) OR (fatal\* NEAR/3 attempt\*) OR (fatal\* NEAR/3 intent\*) OR (dead\* NEAR/3 assault\*) OR (dead\* NEAR/3 attack\*) OR (dead\* NEAR/3 attempt\*) OR (dead\* NEAR/3 intent\*) OR (death\* NEAR/3 assault\*) OR (death\* NEAR/3 attack\*) OR (death\* NEAR/3 attempt\*) OR (death\* NEAR/3 intent\*) OR (mortal\* NEAR/3 assault\*) OR (mortal\* NEAR/3 attack\*) OR (mortal\* NEAR/3 attempt\*) OR (mortal\* NEAR/3 intent\*)) OR ti(femicide\* OR suicid\* OR shooting\*) OR ab(femicide\*

OR suicid\* OR shooting\*) OR MAINSUBJECT.EXACT("Suicide") OR ((MAINSUBJECT.EXACT("Family Violence") OR MAINSUBJECT.EXACT("Spouse Abuse")) AND MAINSUBJECT.EXACT("Death")) OR (noft(((partner\* OR spouse\* OR spousal\* OR boyfriend\* OR girlfriend\* OR wife OR wives OR woman\* OR women\* OR female? OR dating OR domestic\* OR intimate OR marital\* OR marriage\* OR married\*) NEAR/3 (assault\* OR attack\* OR brutal\* OR violen\*))) AND noft(dead\* OR death\* OR fatal\* OR mortal\*))) OR (noft((firearm\* OR "fire arm" OR "fire arms" OR gun OR guns OR handgun\* OR "hand-gun" OR "hand-guns" OR longgun\* OR "long-gun" OR "long guns" OR pistol\* OR revolver\* OR "automatic weapon" OR "automatic weapons" OR "semiautomatic weapon" OR "semiautomatic weapons" OR "semi-automatic weapon" OR "semi-automatic weapons" OR shotgun\* OR "shot-gun" OR "shot-guns" OR rifle\*)) AND noft(dead\* OR death\* OR fatal\* OR mortal\*)) AND (MAINSUBJECT.EXACT("Jurisprudence") OR (MAINSUBJECT.EXACT("Licenses") OR ti(licenc\* OR licens\* OR permit OR permits OR "permission to carry" OR "permissions to carry") OR ab(licenc\* OR licens\* OR permit OR permits OR "permission to carry" OR "permissions to carry"))) OR (ti(ERPO OR ERPOs OR EPO OR EPOs OR EIO OR EIOs OR "red flag" OR "red flags" OR "yellow flag" OR "yellow flags") OR ab(ERPO OR ERPOs OR EPO OR EPOs OR EIO OR EIOs OR "red flag" OR "red flags" OR "yellow flag" OR "yellow flags")) OR (ti("Bill C-21" OR "Bill C21" OR "Bill C-71" OR "Bill C71" OR "Anastasia's Law") OR ab("Bill C-21" OR "Bill C21" OR "Bill C-71" OR "Bill C71" OR "Anastasia's Law")))) OR (((MAINSUBJECT.EXACT("Firearms") OR ti(firearm\* OR "fire arm" OR "fire arms" OR gun OR guns OR handgun\* OR "hand-gun" OR "hand-guns" OR longgun\* OR "long-gun" OR "long guns" OR pistol\* OR revolver\* OR "automatic weapon" OR "automatic weapons" OR "semiautomatic weapon" OR "semiautomatic weapons" OR "semi-automatic weapon" OR "semi-automatic weapons" OR shotgun\* OR "shot-gun" OR "shot-guns" OR rifle\*)) OR ab(firearm\* OR "fire arm" OR "fire arms" OR gun OR guns OR handgun\* OR "hand-gun" OR "hand-guns" OR longgun\* OR "long-gun" OR "long guns" OR pistol\* OR revolver\* OR "automatic weapon" OR "automatic weapons" OR "semiautomatic weapon" OR "semiautomatic weapons" OR "semi-automatic weapon" OR "semi-automatic weapons" OR shotgun\* OR "shot-gun" OR "shot-guns" OR rifle\*)) AND (((MAINSUBJECT.EXACT("Massacre") OR MAINSUBJECT.EXACT("Homicide")) OR ti(homicide\* OR kill OR killed OR kills OR killing\* OR murder\* OR "wrongful death" OR "wrongful deaths" OR slay\* OR (fatal\* NEAR/3 assault\*) OR (fatal\* NEAR/3 attack\*) OR (fatal\* NEAR/3 attempt\*) OR (fatal\* NEAR/3 intent\*) OR (dead\* NEAR/3 assault\*) OR (dead\* NEAR/3 attack\*) OR (dead\* NEAR/3 attempt\*) OR (dead\* NEAR/3 intent\*) OR (death\* NEAR/3 assault\*) OR (death\* NEAR/3 attack\*) OR (death\* NEAR/3 attempt\*) OR (death\* NEAR/3 intent\*) OR (mortal\* NEAR/3 assault\*) OR (mortal\* NEAR/3 attack\*) OR (mortal\* NEAR/3 attempt\*) OR (mortal\* NEAR/3 intent\*)) OR ab(homicide\* OR kill OR killed OR kills OR killing\* OR murder\* OR "wrongful death" OR "wrongful deaths" OR slay\* OR (fatal\* NEAR/3 assault\*) OR (fatal\* NEAR/3 attack\*) OR (fatal\* NEAR/3 attempt\*) OR (fatal\* NEAR/3 intent\*) OR (dead\* NEAR/3 assault\*) OR (dead\* NEAR/3 attack\*) OR (dead\* NEAR/3 attempt\*) OR (dead\* NEAR/3 intent\*) OR (death\* NEAR/3 assault\*) OR (death\* NEAR/3 attack\*) OR (death\* NEAR/3 attempt\*) OR (death\* NEAR/3 intent\*) OR (mortal\* NEAR/3 assault\*) OR (mortal\* NEAR/3 attack\*) OR (mortal\* NEAR/3 attempt\*) OR (mortal\* NEAR/3 intent\*)) OR ti(femicide\* OR suicid\* OR shooting\*) OR ab(femicide\* OR suicid\* OR shooting\*)) OR MAINSUBJECT.EXACT("Suicide") OR ((MAINSUBJECT.EXACT("Family Violence") OR MAINSUBJECT.EXACT("Spouse Abuse")) AND MAINSUBJECT.EXACT("Death")) OR (noft(((partner\* OR spouse\* OR spousal\* OR boyfriend\* OR girlfriend\* OR wife OR wives OR woman\* OR women\* OR female? OR dating OR domestic\* OR intimate OR marital\* OR marriage\* OR married\*) NEAR/3 (assault\* OR attack\* OR brutal\* OR violen\*))) AND noft(dead\* OR death\* OR fatal\* OR mortal\*))) OR (noft((firearm\* OR "fire arm" OR "fire arms" OR gun OR guns OR handgun\* OR "hand-gun" OR "hand-guns" OR longgun\* OR "long-gun" OR "long guns" OR pistol\* OR revolver\* OR "automatic weapon" OR "automatic weapons" OR "semiautomatic weapon" OR "semiautomatic weapons" OR "semi-automatic weapon" OR "semi-automatic weapons" OR shotgun\* OR "shot-gun" OR "shot-guns" OR rifle\*)) AND noft(dead\* OR death\* OR fatal\* OR mortal\*)) AND (ti(control\* OR criminalis\* OR criminaliz\* OR decriminali\* OR

depenali\* OR deregulat\* OR enforc\* OR government\* OR law OR laws OR legal\* OR legislat\* OR liberali\* OR ordinance\* OR penaliz\* OR penalis\* OR police OR policing OR policy OR policies OR politic\* OR regulat\* OR statute\*) OR ab(control\* OR criminalis\* OR criminaliz\* OR decriminali\* OR depenali\* OR deregulat\* OR enforc\* OR government\* OR law OR laws OR legal\* OR legislat\* OR liberali\* OR ordinance\* OR penaliz\* OR penalis\* OR police OR policing OR policy OR policies OR politic\* OR regulat\* OR statute\*)) – 678 records

---

## Firearms Legislation

Extended search

2024 Mar 19

## Ovid Multifile

Database: Embase Classic+Embase <1947 to 2024 March 18>, Ovid MEDLINE(R) ALL <1946 to March 18, 2024>, APA PsycInfo <1806 to March Week 3 2024>

Search Strategy:

- 
- 1 Firearms/ (16281)
  - 2 (firearm? or fire arm? or gun or guns or handgun? or hand-gun? or longgun? or long-gun? or pistol? or revolver? or automatic weapon? or semiautomatic weapon? or semi-automatic weapon? or shotgun? or shot-gun? or rifle?).tw,kw,kf. (77723)
  - 3 or/1-2 [FIREARMS] (81143)
  - 4 exp Homicide/ (58510)
  - 5 (homicide\* or kill or killed or kills or killing\* or murder\* or wrongful death\* or slay\* or (fatal\* adj3 assault\*) or (fatal\* adj3 attack\*) or (fatal\* adj3 attempt\*) or (fatal\* adj3 intent\*) or (dead\* adj3 assault\*) or (dead\* adj3 attack\*) or (dead\* adj3 attempt\*) or (dead\* adj3 intent\*) or (death\* adj3 assault\*) or (death\* adj3 attack\*) or (death\* adj3 attempt\*) or (death\* adj3 intent\*) or (mortal\* adj3 assault\*) or (mortal\* adj3 attack\*) or (mortal\* adj3 attempt\*) or (mortal\* adj3 intent\*)).tw,kw,kf. (467334)
  - 6 femicide\*.tw,kw,kf. (752)
  - 7 Suicide/ (146285)
  - 8 Suicide, Completed/ (73230)
  - 9 suicid\*.tw,kw,kf. (315179)
  - 10 Mass Casualty Incidents/ (5799)
  - 11 shooting\*.tw,kw,kf. (17846)
  - 12 Domestic Violence/ and (Death/ or (dead\* or death\* or fatal\* or mortal\*).tw,kw,kf.) (1762)
  - 13 Spouse Abuse/ and (Death/ or (dead\* or death\* or fatal\* or mortal\*).tw,kw,kf.) (1108)
  - 14 Intimate Partner Violence/ and (Death/ or (dead\* or death\* or fatal\* or mortal\*).tw,kw,kf.) (1401)
  - 15 (((partner\* or spouse\* or spousal\* or boyfriend? or girlfriend? or wife or wives or wom#n\* or female? or dating or domestic\* or intimate or marital\* or marriage\* or married\*) adj3 (assault\* or attack\* or brutal\* or violen\*)) and (dead\* or death\* or fatal\* or mortal\*)).tw,kw,kf. (5055)
  - 16 ((partner\* or spouse\* or spousal\* or boyfriend? or girlfriend? or wife or wives or wom#n\* or female? or dating or domestic\* or intimate or marital\* or marriage\* or married\*) adj3 (assault\* or attack\* or brutal\* or violen\*)).tw,kw,kf. and Death/ (238)
  - 17 or/4-16 [HOMICIDE, FEMICIDE, SUICIDE, ETC] (836124)
  - 18 3 and 17 [FIREARMS - HOMICIDE, FEMICIDE, SUICIDE, ETC] (15514)
  - 19 Gun Violence/ and (Death/ or (dead\* or death\* or fatal\* or mortal\*).tw,kw,kf.) (670)
  - 20 ((firearm? or fire arm? or gun or guns or handgun? or hand-gun? or longgun? or long-gun? or pistol? or revolver? or automatic weapon? or semiautomatic weapon? or semi-automatic weapon? or shotgun? or shot-gun? or rifle?) adj5 (dead\* or death\* or fatal\* or mortal\*)).tw,kw,kf. (4164)

21 (firearm? or fire arm? or gun or guns or handgun? or hand-gun? or longgun? or long-gun? or pistol? or revolver? or automatic weapon? or semiautomatic weapon? or semi-automatic weapon? or shotgun? or shot-gun? or rifle?).tw,kw,kf. and Death/ (773)

22 or/19-21 [GUN VIOLENCE/DEATH] (5025)

23 18 or 22 [FIREARMS - HOMICIDE, ETC, GUN VIOLENCE/DEATH] (17688)

24 Legislation/ (105848)

25 Legislation as Topic/ (120198)

26 lj.fs. [Legislation & Jurisprudence] (261057)

27 Policy/ (108812)

28 Policy Making/ (102701)

29 Public Policy/ (67040)

30 Politics/ (142378)

31 Social Control Policies/ (16543)

32 Social Control, Formal/ (27712)

33 Criminal Law/ (15247)

34 exp Government/ (356243)

35 Law Enforcement/ (22793)

36 Government Regulation/ (51437)

37 (control\* or criminalis\* or criminaliz\* or decriminali\* or de-criminali\* or depenali\* or de-penali\* or deregulat\* or de-regulat\* or enforc\* or government\* or law or laws or legal\* or legislat\* or liberali\* or ordinance? or penaliz\* or penalis\* or police or policing or policy or policies or politic\* or regulat\* or statute?).tw,kw,kf. (18081065)

38 Jurisprudence/ (61762)

39 (jurispruden\* or judicial\* or justice\*).tw,kw,kf. (146374)

40 Licensure/ (33996)

41 (licenc\* or licens\* or permit or permits or "permission? to carry").tw,kw,kf. (564539)

42 (ERPO or ERPOs or EPO or EPOs or EIO or EIOs or red flag? or yellow flag?).tw,kw,kf. (43243)

43 (Bill C-21 or Bill C21 or Bill C-71 or Bill C71 or "Anastasia's Law").tw,kw,kf. (0)

44 or/24-43 [LEGISLATION] (19117650)

45 23 and 44 [FIREARMS - HOMICIDE, ETC, GUN VIOLENCE] (7817)

46 exp Animals/ not Humans/ (18135191)

47 45 not 46 [ANIMAL-ONLY REMOVED] (7067)

48 47 use medall [**MEDLINE RECORDS**] (2791)

49 exp firearm/ (16675)

50 (firearm? or fire arm? or gun or guns or handgun? or hand-gun? or longgun? or long-gun? or pistol? or revolver? or automatic weapon? or semiautomatic weapon? or semi-automatic weapon? or shotgun? or shot-gun? or rifle?).tw,kw,kf. (77723)

51 or/49-50 [FIREARMS] (81281)

52 homicide/ (42969)

53 (homicide\* or kill or killed or kills or killing\* or murder\* or wrongful death\* or slay\* or (fatal\* adj3 assault\*) or (fatal\* adj3 attack\*) or (fatal\* adj3 attempt\*) or (fatal\* adj3 intent\*) or (dead\* adj3 assault\*) or (dead\* adj3 attack\*) or (dead\* adj3 attempt\*) or (dead\* adj3 intent\*) or (death\* adj3 assault\*) or (death\* adj3 attack\*) or (death\* adj3 attempt\*) or (death\* adj3 intent\*) or (mortal\* adj3 assault\*) or (mortal\* adj3 attack\*) or (mortal\* adj3 attempt\*) or (mortal\* adj3 intent\*)).tw,kw,kf. (467334)

54 femicide\*.tw,kw,kf. (752)

55 suicide/ (146285)

56 suicid\*.tw,kw,kf. (315179)

57 shooting\*.tw,kw,kf. (17846)

58 domestic violence/ and (death/ or fatality/ or lethality/ or (dead\* or death\* or fatal\* or mortal\*).tw,kw,kf.) (1775)

59 partner violence/ and (death/ or fatality/ or lethality/ or (dead\* or death\* or fatal\* or mortal\*).tw,kw,kf.) (1213)

60 (((partner\* or spouse\* or spousal\* or boyfriend? or girlfriend? or wife or wives or wom#n\* or female? or dating or domestic\* or intimate or marital\* or marriage\* or married\*) adj3 (assault\* or attack\* or brutal\* or violent\*)) and (dead\* or death\* or fatal\* or mortal\*).tw,kw,kf. (5055)

61 ((partner\* or spouse\* or spousal\* or boyfriend? or girlfriend? or wife or wives or wom#n\* or female? or dating or domestic\* or intimate or marital\* or marriage\* or married\*) adj3 (assault\* or attack\* or brutal\* or violent\*).tw,kw,kf. and Death/ (238)

62 or/52-61 [HOMICIDE, FEMICIDE, SUICIDE, ETC] (819398)

63 51 and 62 [FIREARMS - HOMICIDE, FEMICIDE, SUICIDE, ETC] (15420)

64 gun violence/ and (death/ or fatality/ or lethality/ or (dead\* or death\* or fatal\* or mortal\*).tw,kw,kf.) (682)

65 ((firearm? or fire arm? or gun or guns or handgun? or hand-gun? or longgun? or long-gun? or pistol? or revolver? or automatic weapon? or semiautomatic weapon? or semi-automatic weapon? or shotgun? or shot-gun? or rifle?) adj5 (dead\* or death\* or fatal\* or mortal\*).tw,kw,kf. (4164)

66 (firearm? or fire arm? or gun or guns or handgun? or hand-gun? or longgun? or long-gun? or pistol? or revolver? or automatic weapon? or semiautomatic weapon? or semi-automatic weapon? or shotgun? or shot-gun? or rifle?).tw,kw,kf. and Death/ (773)

67 or/64-66 [GUN VIOLENCE/DEATH] (5037)

68 63 or 67 [FIREARMS - HOMICIDE, ETC, GUN VIOLENCE/DEATH] (17609)

69 policy/ (108812)

70 public policy/ (67040)

71 politics/ (142378)

72 social control/ (30673)

73 law/ (134204)

74 criminal law/ (15247)

75 government/ (211027)

76 law enforcement/ (22793)

77 government regulation/ (51437)

78 (control\* or criminalis\* or criminaliz\* or decriminali\* or de-criminali\* or depenali\* or de-penali\* or deregulat\* or de-regulat\* or enforc\* or government\* or law or laws or legal\* or legislat\* or liberali\* or ordinance? or penaliz\* or penalis\* or police or policing or policy or policies or politic\* or regulat\* or statute?).tw,kw,kf. (18081065)

79 jurisprudence/ (61762)

80 (jurispruden\* or judicial\* or justice\*).tw,kw,kf. (146374)

81 licensing/ (35214)

82 (licenc\* or licens\* or permit or permits or "permission? to carry").tw,kw,kf. (564539)

83 (ERPO or ERPOs or EPO or EPOs or EIO or EIOs or red flag? or yellow flag?).tw,kw,kf. (43243)

84 (Bill C-21 or Bill C21 or Bill C-71 or Bill C71 or "Anastasia's Law").tw,kw,kf. (0)

85 or/69-84 [LEGISLATION] (18868343)

86 68 and 85 [FIREARMS - HOMICIDE, ETC, GUN VIOLENCE] (7488)

87 exp animal/ or exp animal experimentation/ or exp animal model/ or exp animal experiment/ or nonhuman/ or exp vertebrate/ (63272738)

88 exp human/ or exp human experimentation/ or exp human experiment/ (49516477)

89 86 not 87 (2116)

90 86 not 89 [ANIMAL-ONLY REMOVED] (5372)

91 conference abstract.pt. (5090476)

92 90 not 91 [CONFERENCE ABSTRACTS REMOVED] (5071)

93 92 use emczd [EMBASE RECORDS] (2873)

94 Firearms/ (16281)

95 (firearm? or fire arm? or gun or guns or handgun? or hand-gun? or longgun? or long-gun? or pistol? or revolver? or automatic weapon? or semiautomatic weapon? or semi-automatic weapon? or shotgun? or shot-gun? or rifle?).tw,id. (75920)

96 or/94-95 [FIREARMS] (79452)

97 exp Homicide/ (58510)

98 (homicide\* or kill or killed or kills or killing\* or murder\* or wrongful death\* or slay\* or (fatal\* adj3 assault\*) or (fatal\* adj3 attack\*) or (fatal\* adj3 attempt\*) or (fatal\* adj3 intent\*) or (dead\* adj3 assault\*) or (dead\* adj3 attack\*) or (dead\* adj3 attempt\*) or (dead\* adj3 intent\*) or (death\* adj3 assault\*) or (death\* adj3 attack\*) or (death\* adj3 attempt\*) or (death\* adj3 intent\*) or (mortal\* adj3 assault\*) or (mortal\* adj3 attack\*) or (mortal\* adj3 attempt\*) or (mortal\* adj3 intent\*)).tw,id. (465411)

99 femicide\*.tw,id. (705)

100 Suicide/ (146285)

101 suicid\*.tw,id. (311118)

102 Mass Murder/ (452)

103 shooting\*.tw,id. (17612)

104 Domestic Violence/ and (dead\* or death\* or fatal\* or mortal\*).tw,id. (1689)

105 Intimate Partner Violence/ and (dead\* or death\* or fatal\* or mortal\*).tw,id. (1372)

106 (((partner\* or spouse\* or spousal\* or boyfriend? or girlfriend? or wife or wives or wom#n\* or female? or dating or domestic\* or intimate or marital\* or marriage\* or married\*) adj3 (assault\* or attack\* or brutal\* or violen\*)) and (dead\* or death\* or fatal\* or mortal\*)).tw,id. (4805)

107 or/97-106 [HOMICIDE, FEMICIDE, SUICIDE, ETC] (826432)

108 96 and 107 [FIREARMS - HOMICIDE, FEMICIDE, SUICIDE, ETC] (15136)

109 Gun Violence/ and (dead\* or death\* or fatal\* or mortal\*).tw,id. (647)

110 ((firearm? or fire arm? or gun or guns or handgun? or hand-gun? or longgun? or long-gun? or pistol? or revolver? or automatic weapon? or semiautomatic weapon? or semi-automatic weapon? or shotgun? or shot-gun? or rifle?) adj5 (dead\* or death\* or fatal\* or mortal\*)).tw,id. (4077)

111 109 or 110 [GUN VIOLENCE/DEATH] (4405)

112 108 or 111 [FIREARMS - HOMICIDE, ETC, GUN VIOLENCE/DEATH] (16982)

113 Policy Making/ (102701)

114 Politics/ (142378)

115 Social Control/ (30673)

116 Laws/ (48647)

117 Gun Control Laws/ (403)

118 Government/ (211027)

119 Law Enforcement/ (22793)

120 Government Policy Making/ (22861)

121 (control\* or criminalis\* or criminaliz\* or decriminali\* or de-criminali\* or depenali\* or de-penali\* or deregulat\* or de-regulat\* or enforc\* or government\* or law or laws or legal\* or legislat\* or liberali\* or ordinance? or penaliz\* or penalis\* or police or policing or policy or policies or politic\* or regulat\* or statute?).tw,id. (17918920)

122 "Law (Government)"/ (1064)

123 (jurispruden\* or judicial\* or justice\*).tw,id. (135522)

124 (licenc\* or licens\* or permit or permits or "permission? to carry").tw,id. (563080)

125 (ERPO or ERPOs or EPO or EPOs or EIO or EIOs or red flag? or yellow flag?).tw,id. (42605)

126 (Bill C-21 or Bill C21 or Bill C-71 or Bill C71 or "Anastasia's Law").tw,id. (0)

127 or/113-126 [LEGISLATION] (18641976)

128 112 and 127 [FIREARMS - HOMICIDE, ETC, GUN VIOLENCE] (7064)

129 128 use psych [PSYCINFO RECORDS] (1546)

130 48 or 93 or 129 [ALL DATABASES] (7210)

131 (202111\* or 2021112\* or 2022\* or 2023\* or 2024\*).dt. (3651124)

132 48 and 131 [MEDLINE RECORDS - UPDATE PERIOD] (462)

- 133 (202111\* or 2021112\* or 2022\* or 2023\* or 2024\*).dc. (4983592)
- 134 93 and 133 [EMBASE RECORDS - UPDATE PERIOD] (596)
- 135 (202111\* or 2021112\* or 2022\* or 2023\* or 2024\*).up. (42928840)
- 136 129 and 135 [PSYCINFO RECORDS - UPDATE PERIOD] (250)
- 137 132 or 134 or 136 [ALL DATABASES - UPDATE PERIOD] (1308)
- 138 remove duplicates from 137 [TOTAL UNIQUE RECORDS - UPDATE PERIOD] (827)
- 139 138 use medall [MEDLINE UNIQUE RECORDS - UPDATE PERIOD] (456)
- 140 138 use emczd [EMBASE UNIQUE RECORDS - UPDATE PERIOD] (211)
- 141 138 use psyh [PSYCINFO UNIQUE RECORDS - UPDATE PERIOD] (160)



### Appendix 3: List of grey literature sources

| Organization                                                           | Website Link                                                                                                                                                                    |
|------------------------------------------------------------------------|---------------------------------------------------------------------------------------------------------------------------------------------------------------------------------|
| <b>Canada</b>                                                          |                                                                                                                                                                                 |
| <i><b>Regional/Provincial-level Groups</b></i>                         |                                                                                                                                                                                 |
| UBC's Centre for Health Services and Policy Research (CHSPR)           | <a href="https://chspr.ubc.ca/">https://chspr.ubc.ca/</a>                                                                                                                       |
| Alberta Public Health Association (APHA)                               | <a href="https://www.apha.ab.ca/">https://www.apha.ab.ca/</a>                                                                                                                   |
| Alberta Health Services                                                | <a href="https://www.albertahealthservices.ca/default.aspx">https://www.albertahealthservices.ca/default.aspx</a>                                                               |
| Saskatchewan Health Quality Council                                    | <a href="https://www.hqc.sk.ca/">https://www.hqc.sk.ca/</a>                                                                                                                     |
| Manitoba Public Health Association                                     | <a href="https://manitobapha.ca/">https://manitobapha.ca/</a>                                                                                                                   |
| Winnipeg Regional Health Authority (WRHA)                              | <a href="https://wrha.mb.ca/health-equity/reports/">https://wrha.mb.ca/health-equity/reports/</a>                                                                               |
| Ontario Ministry of Health and LTC                                     | <a href="http://health.gov.on.ca/en/">http://health.gov.on.ca/en/</a>                                                                                                           |
| Ontario Public Health Association (OPHA)                               | <a href="https://opha.on.ca/Home.aspx">https://opha.on.ca/Home.aspx</a>                                                                                                         |
| Public Health Ontario (PHO)                                            | <a href="https://www.publichealthontario.ca/">https://www.publichealthontario.ca/</a>                                                                                           |
| Wellesley Institute                                                    | <a href="https://www.wellesleyinstitute.com/">https://www.wellesleyinstitute.com/</a>                                                                                           |
| Institut national de santé publique du Québec                          | <a href="https://www.inspq.qc.ca/">https://www.inspq.qc.ca/</a>                                                                                                                 |
| Quebec Population Health Research Network                              | <a href="https://santepop.qc.ca/en">https://santepop.qc.ca/en</a>                                                                                                               |
| Newfoundland & Labrador Centre For Applied Health Research             | <a href="https://www.nlcahr.mun.ca/">https://www.nlcahr.mun.ca/</a>                                                                                                             |
| Public Health Association of Nova Scotia (PHANS)                       | <a href="https://www.phans.ca/">https://www.phans.ca/</a>                                                                                                                       |
| <i><b>National-level Groups</b></i>                                    |                                                                                                                                                                                 |
| Association of Local Public Health Agencies (alPHa)                    | <a href="https://www.alphaweb.org/">https://www.alphaweb.org/</a>                                                                                                               |
| Canadian Association for Health Services and Policy Research (CAHSPR)  | <a href="https://cahspr.ca/#home">https://cahspr.ca/#home</a>                                                                                                                   |
| Canadian Institute for Health Information (CIHI)                       | <a href="https://www.cihi.ca/en">https://www.cihi.ca/en</a>                                                                                                                     |
| Canadian Public Health Association (CPHA)                              | <a href="https://www.cpha.ca/">https://www.cpha.ca/</a>                                                                                                                         |
| The Conference Board of Canada                                         | <a href="https://www.conferenceboard.ca/">https://www.conferenceboard.ca/</a>                                                                                                   |
| <b>International Groups</b>                                            |                                                                                                                                                                                 |
| <i><b>International Organizations</b></i>                              |                                                                                                                                                                                 |
| Overton                                                                | <a href="https://www.overton.io/">https://www.overton.io/</a>                                                                                                                   |
| European Commission Public Health Guidelines International Network     | <a href="https://ec.europa.eu/health/home_en">https://ec.europa.eu/health/home_en</a>                                                                                           |
| Pan American Health Organization (PAHO)                                | <a href="https://www.paho.org/en">https://www.paho.org/en</a>                                                                                                                   |
| <i><b>Australia</b></i>                                                |                                                                                                                                                                                 |
| Public Health Association Australia (PHAA)                             | <a href="https://www.phaa.net.au/">https://www.phaa.net.au/</a>                                                                                                                 |
| <i><b>UK</b></i>                                                       |                                                                                                                                                                                 |
| Department of Health & Social Care                                     | <a href="https://www.gov.uk/government/organisations/department-of-health-and-social-care">https://www.gov.uk/government/organisations/department-of-health-and-social-care</a> |
| National Institute for Health Research. Horizon Scanning Centre (NHSC) | <a href="https://www.nihr.ac.uk/">https://www.nihr.ac.uk/</a>                                                                                                                   |
| <i><b>USA</b></i>                                                      |                                                                                                                                                                                 |
| American Public Health Association (APHA)                              | <a href="https://www.apha.org/">https://www.apha.org/</a>                                                                                                                       |
| Association of State and Territorial Health Officials (ASTHO)          | <a href="https://www.astho.org/">https://www.astho.org/</a>                                                                                                                     |
| California Health Care Foundation (CHCF)                               | <a href="https://www.chcf.org/">https://www.chcf.org/</a>                                                                                                                       |
| Center for Economic and Policy Research (CEPR)                         | <a href="https://www.cepr.net/">https://www.cepr.net/</a>                                                                                                                       |

|                                                                      |                                                                                                           |
|----------------------------------------------------------------------|-----------------------------------------------------------------------------------------------------------|
| Center for Health Care Strategies Inc. (CHCS)                        | <a href="https://www.chcs.org/">https://www.chcs.org/</a>                                                 |
| Center for Mississippi Health Policy                                 | <a href="https://mshealthpolicy.com/">https://mshealthpolicy.com/</a>                                     |
| Center for the Study of Social Policy                                | <a href="https://cssp.org/">https://cssp.org/</a>                                                         |
| Health Policy Institute                                              | <a href="https://hpi.georgetown.edu/">https://hpi.georgetown.edu/</a>                                     |
| Health Policy Institute of Ohio (HPIO)                               | <a href="https://www.healthpolicyohio.org/">https://www.healthpolicyohio.org/</a>                         |
| Health Resources & Services Administration (HRSA)                    | <a href="https://www.hrsa.gov/">https://www.hrsa.gov/</a>                                                 |
| Institute for Women's Policy Research                                | <a href="https://iwpr.org/">https://iwpr.org/</a>                                                         |
| National Association of County and City Health Officials (NACCHO)    | <a href="https://www.naccho.org/">https://www.naccho.org/</a>                                             |
| National Academy for State Health Policy (NASHP)                     | <a href="https://www.nashp.org/">https://www.nashp.org/</a>                                               |
| Prevention Institute                                                 | <a href="https://preventioninstitute.org/">https://preventioninstitute.org/</a>                           |
| Public Health Foundation (PHF)                                       | <a href="http://www.phf.org/Pages/default.aspx">http://www.phf.org/Pages/default.aspx</a>                 |
| Public Health Informatics Institute (PHII)                           | <a href="https://www.phii.org/">https://www.phii.org/</a>                                                 |
| RAND Corporation                                                     | <a href="https://www.rand.org/">https://www.rand.org/</a>                                                 |
| Robert Wood Johnson Foundation (RWJF)                                | <a href="https://www.rwjf.org/">https://www.rwjf.org/</a>                                                 |
| Society for Public Health Education (SOPHE)                          | <a href="https://www.sophe.org/">https://www.sophe.org/</a>                                               |
| The Commonwealth Fund                                                | <a href="https://www.commonwealthfund.org/">https://www.commonwealthfund.org/</a>                         |
| UCLA Center for Health Policy Research (ULCA CHPR)                   | <a href="https://healthpolicy.ucla.edu/Pages/home.aspx">https://healthpolicy.ucla.edu/Pages/home.aspx</a> |
| US Department of Health and Human Services Office of Minority Health | <a href="https://minorityhealth.hhs.gov/">https://minorityhealth.hhs.gov/</a>                             |
| W.K. Kellogg Foundation                                              | <a href="https://www.wkkf.org/">https://www.wkkf.org/</a>                                                 |

#### Appendix 4: Critical Appraisal

The evaluation involved using a set of criteria that could earn a total of 21 points. The criteria were divided into three groups: study design, statistical methodology, and quality of reporting. The study design criteria assessed the design, sample size, source of data, level of data aggregation, level of inference, pre-specification of ecologic units, and outcomes of interest. The statistical methodology assessed the use of analytic methodology, validity of regression, and adjustment for covariates. The quality of reporting was assessed based on whether the study provided a clear statement and justification of its design, as well as whether the limitations included cross-level bias were acknowledged in the discussion section.

|      |                | STUDY DESIGN<br><i>(out of 12)</i> |             |                             |                           |                    |                                     |                               |                | STATISTICAL METHODOLOGY<br><i>(out of 6)</i> |                        |                   |                                  | QUALITY OF REPORTING<br><i>(out of 3)</i> |                               |                                                |
|------|----------------|------------------------------------|-------------|-----------------------------|---------------------------|--------------------|-------------------------------------|-------------------------------|----------------|----------------------------------------------|------------------------|-------------------|----------------------------------|-------------------------------------------|-------------------------------|------------------------------------------------|
| ID # | Study ID       | Design                             | Sample size | Unbiased inclusion of units | Level of data aggregation | Level of inference | Pre-specification of ecologic units | Outcomes of interest included | Source of data | Analytic methodology                         | Validity of regression | Use of covariates | Proper adjustment for covariates | Statement of study design                 | Justification of study design | Discussion of cross-level bias and limitations |
| 227  | Choi 2020      | 2                                  | 1           | 1                           | 3                         | 1                  | 1                                   | 1                             | 1              | 1                                            | 1                      | 2                 | 1                                | 1                                         | 1                             | 1                                              |
| 510  | Olson 2019     | 1                                  | 1           | 1                           | 3                         | 1                  | 1                                   | 1                             | 1              | 1                                            | 1                      | 2                 | 1                                | 0                                         | 1                             | 1                                              |
| 1981 | Snowdon 1992   | 2                                  | 1           | 1                           | 3                         | 1                  | 1                                   | 1                             | 1              | 1                                            | 1                      | 2                 | 1                                | 0                                         | 0                             | 0                                              |
| 3329 | McGarrell 2013 | 1                                  | 1           | 1                           | 2                         | 1                  | 1                                   | 1                             | 1              | 1                                            | 1                      | 2                 | 1                                | 1                                         | 1                             | 1                                              |
| 3695 | Lester 1986    | 1                                  | 1           | 1                           | 3                         | 1                  | 1                                   | 1                             | 1              | 1                                            | 0                      | 2                 | 0                                | 0                                         | 1                             | 0                                              |
| 1148 | Segal 2012     | 2                                  | 1           | 1                           | 1                         | 1                  | 1                                   | 2                             | 1              | 1                                            | 1                      | 2                 | 1                                | 1                                         | 1                             | 1                                              |
| 343  | Kaufman 2020   | 1                                  | 1           | 1                           | 3                         | 1                  | 1                                   | 2                             | 1              | 2                                            | 1                      | 2                 | 1                                | 1                                         | 1                             | 1                                              |
| 742  | Anestis 2017   | 1                                  | 1           | 1                           | 3                         | 1                  | 1                                   | 1                             | 1              | 1                                            | 1                      | 2                 | 0                                | 0                                         | 0                             | 1                                              |
| 1273 | Lubin 2010     | 1                                  | 1           | 1                           | 1                         | 1                  | 1                                   | 1                             | 1              | 1                                            | 0                      | 0                 | 0                                | 0                                         | 0                             | 1                                              |
| 496  | Reeping 2019   | 1                                  | 1           | 1                           | 3                         | 1                  | 1                                   | 1                             | 1              | 1                                            | 1                      | 2                 | 1                                | 0                                         | 0                             | 1                                              |
| 1400 | Sumner 2008    | 1                                  | 1           | 1                           | 3                         | 1                  | 1                                   | 1                             | 1              | 1                                            | 1                      | 2                 | 1                                | 0                                         | 1                             | 1                                              |
| 945  | Anestis 2015   | 2                                  | 1           | 1                           | 3                         | 1                  | 1                                   | 1                             | 1              | 1                                            | 1                      | 2                 | 1                                | 1                                         | 1                             | 1                                              |
| 138  | Sivaraman 2020 | 2                                  | 1           | 1                           | 2                         | 1                  | 1                                   | 1                             | 1              | 1                                            | 1                      | 2                 | 1                                | 1                                         | 1                             | 1                                              |
| 3236 | Raissan 2016   | 1                                  | 1           | 1                           | 3                         | 1                  | 1                                   | 1                             | 1              | 1                                            | 1                      | 2                 | 1                                | 1                                         | 1                             | 1                                              |
| 1162 | Sen 2012       | 2                                  | 1           | 1                           | 3                         | 1                  | 1                                   | 1                             | 1              | 1                                            | 1                      | 2                 | 1                                | 1                                         | 1                             | 1                                              |
| 386  | Levy 2020      | 1                                  | 1           | 1                           | 3                         | 1                  | 1                                   | 1                             | 1              | 1                                            | 0                      | 2                 | 0                                | 0                                         | 1                             | 1                                              |
| 590  | Tseng 2018     | 2                                  | 1           | 1                           | 3                         | 1                  | 1                                   | 1                             | 1              | 1                                            | 1                      | 2                 | 1                                | 0                                         | 1                             | 1                                              |
| 491  | Madhavan 2019  | 1                                  | 1           | 1                           | 3                         | 1                  | 1                                   | 1                             | 1              | 1                                            | 1                      | 1                 | 1                                | 0                                         | 1                             | 1                                              |

**Appendix 5: Study Characteristics**

| <b>Study ID</b>   | <b>Title</b>                                                                                                                   | <b>Study type</b>                                         | <b>Country</b> | <b>Legislation hierarchy</b> | <b>Law category</b>         | <b>Outcomes evaluated</b> |
|-------------------|--------------------------------------------------------------------------------------------------------------------------------|-----------------------------------------------------------|----------------|------------------------------|-----------------------------|---------------------------|
| Duenow 2024       | The effect of gun buy-back law reform on homicides and suicides in Australia                                                   | Non-randomized experimental                               | Australia      | Federal                      | Gun buy-back policy         | Suicide; Homicide         |
| Chapman 2006      | Australia's 1996 gun law reforms: faster falls in firearm deaths, firearm suicides, and a decade without mass shootings        | Time-trend (population level data, multiple time periods) | Australia      | Federal                      | National Firearms Agreement | Suicide; Homicide         |
| Chapman 2016      | Association Between Gun Law Reforms and Intentional Firearm Deaths in Australia, 1979-2013                                     | Time-trend (population level data, multiple time periods) | Australia      | Federal                      | National Firearms Agreement | Suicide; Homicide         |
| Chapman 2018      | Fatal Firearm Incidents Before and After Australia's 1996 National Firearms Agreement Banning Semiautomatic Rifles             | Time-trend (population level data, multiple time periods) | Australia      | Federal                      | National Firearms Agreement | Other: Mass homicide      |
| Gilmour 2018      | The Effect of the Australian National Firearms Agreement on Suicide and Homicide Mortality, 1978-2015                          | Time-trend (population level data, multiple time periods) | Australia      | Federal                      | National Firearms Agreement | Suicide; Homicide         |
| Klieve 2009       | Controlling firearms use in Australia: has the 1996 gun law reform produced the decrease in rates of suicide with this method? | Cross-sectional (population level data, one time period)  | Australia      | Federal                      | National Firearms Agreement | Suicide                   |
| Lee 2010          | The Australian Firearms Buyback and Its Effect on Gun Deaths                                                                   | Time-trend (population level data, multiple time periods) | Australia      | Federal                      | National Firearms Agreement | Suicide; Homicide         |
| McPhedran 2018    | An Evaluation of the Impacts of Changing Firearms Legislation on Australian Female Firearm Homicide Victimization Rates        | Cross-sectional (population level data, one time period)  | Australia      | Federal                      | National Firearms Agreement | Homicide; Femicide        |
| Ozanne-Smith 2004 | Firearm related deaths: the impact of regulatory reform                                                                        | Cross-sectional (population level data, one time period)  | Australia      | Federal                      | National Firearms Agreement | Suicide                   |
| Ukert 2018        | Time series robustness checks to test the effects of the 1996 Australian firearm law on cause-specific mortality               | Cross-sectional (population level data, one time period)  | Australia      | Federal                      | National Firearms Agreement | Suicide; Homicide         |
| Cantor 1995       | The impact of firearm control legislation on suicide in Queensland: preliminary findings                                       | Cross-sectional (population level data, one time period)  | Australia      | Federal                      | The Weapons Act 1990        | Suicide                   |
| McPhedran 2016    | A systematic review of quantitative evidence about the impacts of Australian legislative reform on firearm homicide            | Systematic review                                         | Australia      | Federal                      | National Firearms Agreement | Homicide                  |

|                         |                                                                                                                                              |                                                           |           |         |                                             |                   |
|-------------------------|----------------------------------------------------------------------------------------------------------------------------------------------|-----------------------------------------------------------|-----------|---------|---------------------------------------------|-------------------|
| Snowdon 1992            | Firearms suicides in Australia                                                                                                               | Cross-sectional (population level data, one time period)  | Australia | Federal | National Firearms Agreement                 | Suicide           |
| McPhedran 2012          | Suicide prevention and method restriction: evaluating the impact of limiting access to lethal means among young Australians                  | Cross-sectional (population level data, one time period)  | Australia | Federal | National Suicide Prevention Strategy (NSPS) | Suicide           |
| Kapusta 2007            | Firearm legislation reform in the European Union: impact on firearm availability, firearm suicide and homicide rates in Austria              | Cross-sectional (individual level data, one time period)  | Austria   | Federal | Legislation reform of 1997                  | Suicide; Homicide |
| Konig 2018              | Austrian firearm legislation and its effects on suicide and homicide mortality: A natural quasi-experiment amidst the global economic crisis | Cross-sectional (population level data, one time period)  | Austria   | Federal | Legislation reform of 1997                  | Suicide; Homicide |
| Niederkrotenthaler 2009 | Can media effects counteract legislation reforms? The case of adolescent firearm suicides in the wake of the Austrian firearm legislation    | Cross-sectional (population level data, one time period)  | Austria   | Federal | Multiple laws                               | Suicide           |
| MarinhodeSouzaMde 2007  | Reductions in firearm-related mortality and hospitalizations in Brazil after gun control                                                     | Time-trend (population level data, multiple time periods) | Brazil    | Federal | Multiple laws                               | Homicide          |
| Bridges 2004            | Gun control law (Bill C-17), suicide, and homicide in Canada                                                                                 | Time-trend (population level data, multiple time periods) | Canada    | Federal | Bill C-17                                   | Suicide; Homicide |
| Caron 2008              | Changes in suicide methods in Quebec between 1987 and 2000: the possible impact of bill C-17 requiring safe storage of firearms              | Time-trend (population level data, multiple time periods) | Canada    | Federal | Bill C-17                                   | Suicide           |
| Cheung 2005             | Current trends in youth suicide and firearms regulations                                                                                     | Time-trend (population level data, multiple time periods) | Canada    | Federal | Bill C-17                                   | Suicide           |
| Gagne 2010              | Firearms regulation and declining rates of male suicide in Quebec                                                                            | Time-trend (population level data, multiple time periods) | Canada    | Federal | Bill C-17                                   | Suicide           |
| Caron 2004              | Gun control and suicide: possible impact of Canadian legislation to ensure safe storage of firearms                                          | Time-trend (population level data, multiple time periods) | Canada    | Federal | Bill C-51                                   | Suicide           |
| Carrington 1994         | Gun control and suicide in Ontario                                                                                                           | Time-trend (population level data, multiple time periods) | Canada    | Federal | Bill C-51                                   | Suicide           |
| Leenaars 1994           | Effects of gun control on homicide in Canada                                                                                                 | Cross-sectional (individual level data, one time period)  | Canada    | Federal | Bill C-51                                   | Homicide          |
| Leenaars 1996           | Gender and the impact of gun control on suicide and homicide                                                                                 | Time-trend (population level data, multiple time periods) | Canada    | Federal | Bill C-51                                   | Suicide; Homicide |

|                   |                                                                                                                                     |                                                           |            |                     |                                     |                                            |
|-------------------|-------------------------------------------------------------------------------------------------------------------------------------|-----------------------------------------------------------|------------|---------------------|-------------------------------------|--------------------------------------------|
| Leenaars 1997     | The impact of gun control on suicide and homicide across the life span                                                              | Time-trend (population level data, multiple time periods) | Canada     | Federal             | Bill C-51                           | Suicide; Homicide                          |
| Lester 1993       | Suicide rates in Canada before and after tightening firearm control laws                                                            | Time-trend (population level data, multiple time periods) | Canada     | Federal             | Bill C-51                           | Suicide                                    |
| Bennett 2022      | The effect of legislation on firearm-related deaths in Canada: a systematic review                                                  | Systematic review                                         | Canada     | Federal             | Bill C-51, Bill C-17, and Bill C-68 | Suicide; Homicide; Other: Accidental death |
| McPhedran 2013    | Lethal firearm-related violence against Canadian women: did tightening gun laws have an impact on women's health and safety?        | Time-trend (population level data, multiple time periods) | Canada     | Federal             | Bill C-68                           | Homicide; Femicide; Domestic violence      |
| Bennett 2022      | Mandatory gunshot wound reporting in Nova Scotia: a pre-post-evaluation of firearm-related injury rates                             | Time-trend (population level data, multiple time periods) | Canada     | Provincial or state | Gunshot Wounds Reporting Act        | Suicide; Homicide                          |
| Langmann 2012     | Canadian firearms legislation and effects on homicide 1974 to 2008                                                                  | Cross-sectional (population level data, one time period)  | Canada     | Federal             | Multiple laws                       | Homicide                                   |
| Langmann 2020     | Effect of firearms legislation on suicide and homicide in Canada from 1981 to 2016                                                  | Time-trend (population level data, multiple time periods) | Canada     | Federal             | Multiple laws                       | Suicide; Homicide                          |
| Langmann 2021     | Suicide, firearms, and legislation: A review of the Canadian evidence                                                               | Systematic review                                         | Canada     | Federal             | Multiple laws                       | Suicide                                    |
| Langmann 2023     | Mass homicide by firearm in Canada: Effects of legislation                                                                          | Other                                                     | Canada     | Federal             | Multiple laws                       | Homicide                                   |
| Vecino-Ortiz 2020 | Gun-carrying restrictions and gun-related mortality, Colombia: a difference-in-difference design with fixed effects                 | Cross-sectional (population level data, one time period)  | Colombia   | Federal             | Firearm carry laws                  | Other: Gun-related mortality               |
| Villaveces 2000   | Effect of a ban on carrying firearms on homicide rates in 2 Colombian cities                                                        | Cross-sectional (population level data, one time period)  | Colombia   | Federal             | Firearm carry laws                  | Homicide                                   |
| Thomsen 1991      | An investigation of the pattern of firearms fatalities before and after the introduction of new legislation in Denmark              | Cross-sectional (population level data, one time period)  | Denmark    | Federal             | Firearms Act (1986)                 | Suicide; Homicide                          |
| Lubin 2010        | Decrease in suicide rates after a change of policy reducing access to firearms in adolescents: a naturalistic epidemiological study | Cross-sectional (population level data, one time period)  |            | Federal             | Military policy                     | Suicide                                    |
| Radojevic 2012    | A comparative analysis of homicides committed with knives and firearms after introducing legal restrictions                         | Time-trend (population level data, multiple time periods) | Montenegro | Federal             | Montenegrin law                     | Homicide                                   |

|                         |                                                                                                                       |                                                           |               |                     |                                         |                                                                                                                                                           |
|-------------------------|-----------------------------------------------------------------------------------------------------------------------|-----------------------------------------------------------|---------------|---------------------|-----------------------------------------|-----------------------------------------------------------------------------------------------------------------------------------------------------------|
| Hurka 2020              | Does regulation matter? A cross-national analysis of the impact of gun policies on homicide and suicide rates         | Time-trend (population level data, multiple time periods) | Multiple      | Provincial or state | Legislative strength                    | Suicide; Homicide                                                                                                                                         |
| Hahn 2005               | Firearms Laws and the Reduction of Violence: A Systematic Review                                                      | Systematic review                                         | Multiple      | Provincial or state | Multiple laws                           | Suicide; Homicide                                                                                                                                         |
| Beautrais 2006          | Firearms legislation and reductions in firearm-related suicide deaths in New Zealand                                  | Time-trend (population level data, multiple time periods) | New Zealand   | Federal             | Amendment to the Arms Act, 1992         | Suicide                                                                                                                                                   |
| Gjertsen 2013           | Mixed impact of firearms restrictions on fatal firearm injuries in males: a national observational study              | Time-trend (population level data, multiple time periods) | Norway        | Federal             | Multiple laws                           | Suicide; Homicide; Other: Unintentional Accidents                                                                                                         |
| Matzopoulos 2018        | A retrospective time trend study of firearm and non-firearm homicide in Cape Town from 1994 to 2013                   | Time-trend (population level data, multiple time periods) | South Africa  | Federal             | Firearm Control Act of 2000             | Homicide                                                                                                                                                  |
| Reisch 2013             | Change in suicide rates in Switzerland before and after firearm restriction resulting from the 2003 "Army XXI" reform | Time-trend (population level data, multiple time periods) | Switzerland   | Federal             | Army XXI Reform                         | Suicide                                                                                                                                                   |
| Swanson 2019            | Criminal Justice and Suicide Outcomes with Indiana's Risk-Based Gun Seizure Law                                       | Cross-sectional (individual level data, one time period)  | United States | Provincial or state | 2006 Indiana Gun Removal Law            | Suicide; Homicide; Domestic violence                                                                                                                      |
| Callcut 2018            | Banning open carry of unloaded handguns decreases firearm-related fatalities and hospital utilization                 | Time-trend (population level data, multiple time periods) | United States | Provincial or state | 2012 California Ban                     | Suicide; Homicide                                                                                                                                         |
| Anestis 2019            | Suicide attempt trends leading up to and following gun lock changes in the 2013 National Defense Authorization Act    | Time-trend (population level data, multiple time periods) | United States | Federal             | 2013 National Defense Authorization Act | Suicide                                                                                                                                                   |
| Ginwalla 2014           | Repeal of the concealed weapons law and its impact on gun-related injuries and deaths                                 | Cohort study                                              | United States | Provincial or state | Arizona Senate Bill 1108                | Suicide; Homicide                                                                                                                                         |
| Anestis 2017            | Rising longitudinal trajectories in suicide rates: The role of firearm suicide rates and firearm legislation          | Time-trend (population level data, multiple time periods) | United States | Provincial or state | Background checks                       | Suicide                                                                                                                                                   |
| Castillo-Carniglia 2019 | California's comprehensive background check and misdemeanor violence prohibition policies and firearm mortality       | Time-trend (population level data, multiple time periods) | United States | Provincial or state | Background checks                       | Suicide; Homicide                                                                                                                                         |
| Crifasi 2018            | Association between Firearm Laws and Homicide in Urban Counties                                                       | Time-trend (population level data, multiple time periods) | United States | Provincial or state | Background checks                       | Homicide                                                                                                                                                  |
| Goyal 2019              | State Gun Laws and Pediatric Firearm-Related Mortality                                                                | Cross-sectional (population level data, one time period)  | United States | Provincial or state | Background checks                       | Suicide; Other: firearm-related mortality rate in children. Deaths were identified by using International Classification of Diseases, 10th Revision Codes |

|                |                                                                                                                       |                                                           |               |                     |                                    |                                      |
|----------------|-----------------------------------------------------------------------------------------------------------------------|-----------------------------------------------------------|---------------|---------------------|------------------------------------|--------------------------------------|
| Kagawa 2018    | Repeal of Comprehensive Background Check Policies and Firearm Homicide and Suicide                                    | Cross-sectional (population level data, one time period)  | United States | Provincial or state | Background checks                  | Suicide; Homicide                    |
| Kagawa 2023    | Effects of Comprehensive Background-Check Policies on Firearm Fatalities in 4 States                                  | Non-randomized experimental                               | United States | Provincial or state | Background checks                  | Suicide; Homicide                    |
| Kaufman 2020   | Universal background checks for handgun purchases can reduce homicide rates of African Americans                      | Cross-sectional (population level data, one time period)  | United States | Provincial or state | Background checks                  | Homicide                             |
| McCourt 2020   | Purchaser Licensing, Point-of-Sale Background Check Laws, and Firearm Homicide and Suicide in 4 US States, 1985-2017  | Cross-sectional (population level data, one time period)  | United States | Provincial or state | Background checks                  | Suicide; Homicide                    |
| Ruddell 2005   | State background checks and firearms homicides                                                                        | Cross-sectional (population level data, one time period)  | United States | Provincial or state | Background checks                  | Homicide                             |
| Sen 2012       | State background checks for gun purchase and firearm deaths: an exploratory study                                     | Cross-sectional (population level data, one time period)  | United States | Federal             | Background checks                  | Suicide; Homicide                    |
| Sumner 2008    | Firearm death rates and association with level of firearm purchase background check                                   | Cross-sectional (population level data, one time period)  | United States | Provincial or state | Background checks                  | Suicide; Homicide                    |
| Ludwig 2000    | Homicide and suicide rates associated with implementation of the Brady Handgun Violence Prevention Act                | Time-trend (population level data, multiple time periods) | United States | Federal             | Brady Bill                         | Suicide; Homicide                    |
| Chammas 2023   | Association Between Child Access Prevention and State Firearm Laws With Pediatric Firearm-Related Deaths              | Cross-sectional (population level data, one time period)  | United States | Provincial or state | Child access prevention laws       | Suicide; Homicide; Other: accidental |
| Azad 2020      | Child Access Prevention Firearm Laws and Firearm Fatalities Among Children Aged 0 to 14 Years, 1991-2016              | Time-trend (population level data, multiple time periods) | United States | Provincial or state | Child Access Prevention Laws (CAP) | Suicide; Homicide                    |
| Cummings 1997  | State gun safe storage laws and child mortality due to firearms                                                       | Cross-sectional (population level data, one time period)  | United States | Provincial or state | Child Access Prevention Laws (CAP) | Suicide; Homicide                    |
| Gius 2015      | The impact of minimum age and child access prevention laws on firearm-related youth suicides and unintentional deaths | Cross-sectional (population level data, one time period)  | United States | Provincial or state | Child Access Prevention Laws (CAP) | Suicide; Other: Unintentional deaths |
| Kappelman 2021 | The effect of state gun laws on youth suicide by firearm: 1981-2017                                                   | Cross-sectional (population level data, one time period)  | United States | Provincial or state | Child Access Prevention Laws (CAP) | Suicide                              |
| Kivisto 2021   | Adolescent Suicide, Household Firearm Ownership, and the Effects of Child Access Prevention Laws                      | Cross-sectional (population level data, one time period)  | United States | Provincial or state | Child Access Prevention Laws (CAP) | Suicide                              |



|                 |                                                                                                                                                                |                                                           |               |                            |                                           |                                                                                               |
|-----------------|----------------------------------------------------------------------------------------------------------------------------------------------------------------|-----------------------------------------------------------|---------------|----------------------------|-------------------------------------------|-----------------------------------------------------------------------------------------------|
| Webster 2000    | Reexamining the association between child access prevention gun laws and unintentional shooting deaths of children                                             | Time-trend (population level data, multiple time periods) | United States | Provincial or state        | Child Access Prevention Laws (CAP)        | Homicide                                                                                      |
| McGarrell 2013  | Attempting to reduce firearms violence through a Comprehensive Anti-Gang Initiative (CAGI): An evaluation of process and impact                                | Cross-sectional (population level data, one time period)  | United States | Provincial or state        | Comprehensive Anti-Gang Initiative (CAGI) | Homicide                                                                                      |
| Carter 2018     | Firearm Violence and Effects on Concealed Gun Carrying: Large Debate and Small Effects                                                                         | Time-trend (population level data, multiple time periods) | United States | Other: Provincial or state | Concealed carry                           | Homicide; Other: Firearm violence (homicide, sexual assault, robbery, and aggravated assault) |
| Crandall 2016   | Prevention of firearm-related injuries with restrictive licensing and concealed carry laws: An Eastern Association for the Surgery of Trauma systematic review | Systematic review                                         | United States | Federal                    | Concealed carry                           | Suicide; Homicide                                                                             |
| Doucette 2019   | Right-to-Carry Laws and Firearm Workplace Homicides: A Longitudinal Analysis (1992-2017)                                                                       | Time-trend (population level data, multiple time periods) | United States | Federal                    | Concealed carry                           | Homicide                                                                                      |
| Doucette 2022   | Officer-Involved Shootings and Concealed Carry Weapons Permitting Laws: Analysis of Gun Violence Archive Data, 2014-2020                                       | Time-trend (population level data, multiple time periods) | United States | Provincial or state        | Concealed carry                           | Homicide; Other: fatal and nonfatal shootings by police officers                              |
| Doucette 2023   | Impact of Changes to Concealed-Carry Weapons Laws on Fatal and Nonfatal Violent Crime, 1980-2019                                                               | Non-randomized experimental                               | United States | Provincial or state        | Concealed carry                           | Homicide; Other: Aggravated assault with a gun, robbery with a gun                            |
| Grimsley 2024   | Transition to Permitless Open Carry and Association with Firearm-Related Suicide                                                                               | Time-trend (population level data, multiple time periods) | United States | Provincial or state        | Concealed carry                           | Suicide; Homicide                                                                             |
| Hamill 2019     | State Level Firearm Concealed-Carry Legislation and Rates of Homicide and Other Violent Crime                                                                  | Cross-sectional (population level data, one time period)  | United States | Provincial or state        | Concealed carry                           | Homicide                                                                                      |
| Hepburn 2004    | The effect of nondiscretionary concealed weapon carrying laws on homicide                                                                                      | Time-trend (population level data, multiple time periods) | United States | Provincial or state        | Concealed carry                           | Homicide                                                                                      |
| Siegel 2017     | Easiness of Legal Access to Concealed Firearm Permits and Homicide Rates in the United States                                                                  | Cross-sectional (population level data, one time period)  | United States | Provincial or state        | Concealed carry                           | Homicide                                                                                      |
| Stansfield 2023 | The Relationship between Concealed Carry Licenses and Firearm Homicide in the US: A Reciprocal County-Level Analysis                                           | Time-trend (population level data, multiple time periods) | United States | Provincial or state        | Concealed carry                           | Homicide                                                                                      |
| O'Carroll 1991  | Preventing homicide: an evaluation of the efficacy of a Detroit gun ordinance                                                                                  | Time-trend (population level data, multiple time periods) | United States | Provincial or state        | Detroit Gun Ordinance                     | Homicide                                                                                      |

|               |                                                                                                                                             |                                                           |               |                     |                                                              |                                   |
|---------------|---------------------------------------------------------------------------------------------------------------------------------------------|-----------------------------------------------------------|---------------|---------------------|--------------------------------------------------------------|-----------------------------------|
| Loftin 1991   | Effects of restrictive licensing of handguns on homicide and suicide in the District of Columbia                                            | Time-trend (population level data, multiple time periods) | United States | Provincial or state | District of Columbia's Firearms Control Regulations Act 1976 | Suicide; Homicide                 |
| Wallace 2021  | Firearm Relinquishment Laws Associated With Substantial Reduction In Homicide Of Pregnant And Postpartum Women                              | Cross-sectional (population level data, one time period)  | United States | Federal             | Domestic Violence Restraining Order (DVRO)                   | Homicide                          |
| Wallin 2021   | The Association of Federal and State-level Firearm Restriction Policies With Intimate Partner Homicide: A Re-analysis by Race of the Victim | Time-trend (population level data, multiple time periods) | United States | Federal             | Domestic Violence Restraining Order (DVRO)                   | Homicide                          |
| Pear 2023     | Law Enforcement Officer Knowledge of, Attitudes Toward, and Willingness to Use Extreme Risk Protection Orders                               | Other                                                     | United States | Provincial or state | ERPO                                                         | N/A                               |
| Pomeranz 2021 | Firearm Extreme Risk Protection Order Laws and Preemption: New Developments and Outstanding Issues, 50 States, 2020                         | Cross-sectional (population level data, one time period)  | United States | Provincial or state | ERPO                                                         | N/A                               |
| Prater 2022   | Civilian Petitioners and Extreme Risk Protection Orders in the State of Washington                                                          | Qualitative study                                         | United States | Provincial or state | ERPO                                                         | N/A                               |
| Gause 2022    | Survey of Washington clinicians' willingness to use and preferences related to extreme risk protection orders                               | Qualitative study                                         | United States | Provincial or state | ERPO                                                         | Other: evaluated adoption of laws |
| DiMaggio 2019 | Changes in US mass shooting deaths associated with the 1994-2004 federal assault weapons ban: Analysis of open-source data                  | Cross-sectional (population level data, one time period)  | United States | Federal             | Federal Assault Weapons Ban (FAWB)                           | Homicide; Other: Mass-shooting    |
| Klarevas 2019 | The Effect of Large-Capacity Magazine Bans on High-Fatality Mass Shootings, 1990-2017                                                       | Cross-sectional (population level data, one time period)  | United States | Provincial or state | Federal Assault Weapons Ban (FAWB)                           | Homicide; Other: Mass-shootings   |
| Post 2021     | Impact of Firearm Surveillance on Gun Control Policy: Regression Discontinuity Analysis                                                     | Time-trend (population level data, multiple time periods) | United States | Provincial or state | Federal Assault Weapons Ban (FAWB)                           | Homicide; Other: Mass shootings   |
| Raissan 2016  | Hold your fire: Did the 1996 federal Gun Control Act expansion reduce domestic homicides?                                                   | Cross-sectional (population level data, one time period)  | United States | Federal             | Federal Gun Control Act                                      | Homicide; Domestic violence       |
| Tessler 2021  | Association of state-level intoxicated driving laws with firearm homicide and suicide                                                       | Cross-sectional (population level data, one time period)  | United States | Federal             | Federal Gun Control Act                                      | Suicide; Homicide                 |
| Lynch 2020    | Implementing Domestic Violence Gun Confiscation Policy in Rural and Urban Communities: Assessing the Perceived Risk, Benefits, and Barriers | Qualitative study                                         | United States | Not reported        | Gun Confiscation Policy                                      | N/A                               |

|               |                                                                                                                                               |                                                          |               |                     |                                                    |                                                |
|---------------|-----------------------------------------------------------------------------------------------------------------------------------------------|----------------------------------------------------------|---------------|---------------------|----------------------------------------------------|------------------------------------------------|
| Pear 2021     | Implementation and perceived effectiveness of gun violence restraining orders in California: A qualitative evaluation                         | Qualitative study                                        | United States | Provincial or state | Gun Violence Restraining Order (GVROs) Laws        | N/A                                            |
| Pear 2022     | Firearm Violence Following the Implementation of California's Gun Violence Restraining Order Law                                              | Cross-sectional (individual level data, one time period) | United States | Provincial or state | Gun Violence Restraining Order (GVROs) Laws        | Suicide; Homicide                              |
| Segal 2012    | Civil commitment law, mental health services, and US homicide rates                                                                           | Cross-sectional (population level data, one time period) | United States | Provincial or state | Involuntary civil comment (ICC) statute provisions | Homicide                                       |
| Alban 2018    | Weaker gun state laws are associated with higher rates of suicide secondary to firearms                                                       | Cross-sectional (individual level data, one time period) | United States | Provincial or state | Legislative strength                               | Suicide                                        |
| Coleman 2021  | Alcohol policies, firearm policies, and suicide in the United States: a lagged cross-sectional study                                          | Cross-sectional (individual level data, one time period) | United States | Provincial or state | Legislative strength                               | Suicide                                        |
| Conner 2003   | State firearm laws and rates of suicide in men and women                                                                                      | Cross-sectional (individual level data, one time period) | United States | Provincial or state | Legislative strength                               | Suicide                                        |
| Fleegler 2014 | Firearm Legislation and Firearm-Related Fatalities in the United States                                                                       | Cross-sectional (population level data, one time period) | United States | Provincial or state | Legislative strength                               | Suicide; Homicide                              |
| Ghiani 2019   | Associations Between Gun Laws and Suicides                                                                                                    | Cross-sectional (population level data, one time period) | United States | Provincial or state | Legislative strength                               | Suicide                                        |
| Gollub 2019   | Firearm legislation and firearm use in female intimate partner homicide using National Violent Death Reporting System data                    | Cross-sectional (population level data, one time period) | United States | Provincial or state | Legislative strength                               | Homicide; Femicide; Domestic violence          |
| Gunn 2021     | The Impact of Firearm Legislation on Firearm Deaths, 1991-2017                                                                                | Cross-sectional (population level data, one time period) | United States | Provincial or state | Legislative strength                               | Suicide; Homicide                              |
| Jehan 2018    | The burden of firearm violence in the United States: stricter laws result in safer states                                                     | Cohort study                                             | United States | Provincial or state | Legislative strength                               | Suicide; Homicide; Femicide; Domestic violence |
| Kalesan 2016  | Firearm Legislation and Firearm Mortality in the USA: A Cross-Sectional State-Level Study                                                     | Cross-sectional (population level data, one time period) | United States | Provincial or state | Legislative strength                               | Suicide; Homicide                              |
| Kaufman 2018  | State Firearm Laws and Interstate Firearm Deaths From Homicide and Suicide in the United States: A Cross-sectional Analysis of Data by County | Cross-sectional (population level data, one time period) | United States | Provincial or state | Legislative strength                               | Suicide; Homicide                              |
| Kivisto 2017  | Firearm Legislation and Fatal Police Shootings in the United States                                                                           | Cross-sectional (population level data, one time period) | United States | Provincial or state | Legislative strength                               | Homicide; Other: Police shootings              |

|               |                                                                                                                                           |                                                           |               |                     |                                           |                                 |
|---------------|-------------------------------------------------------------------------------------------------------------------------------------------|-----------------------------------------------------------|---------------|---------------------|-------------------------------------------|---------------------------------|
| Kposowa 2016  | Impact of Firearm Availability and Gun Regulation on State Suicide Rates                                                                  | Cross-sectional (population level data, one time period)  | United States | Provincial or state | Legislative strength                      | Suicide                         |
| Lester 1980   | The influence of gun control laws on suicidal behavior                                                                                    | Cross-sectional (population level data, one time period)  | United States | Provincial or state | Legislative strength                      | Suicide                         |
| Lester 1986   | The influence of gun control laws on personal violence                                                                                    | Cross-sectional (population level data, one time period)  | United States | Provincial or state | Legislative strength                      | Suicide; Homicide               |
| Madhavan 2019 | Firearm Legislation Stringency and Firearm-Related Fatalities among Children in the US                                                    | Cross-sectional (population level data, one time period)  | United States | Provincial or state | Legislative strength                      | Suicide; Homicide               |
| Olson 2019    | American firearm homicides: The impact of your neighbors                                                                                  | Cross-sectional (population level data, one time period)  | United States | Provincial or state | Legislative strength                      | Homicide                        |
| Reeping 2019  | State gun laws, gun ownership, and mass shootings in the US: cross sectional time series                                                  | Cross-sectional (population level data, one time period)  | United States | Provincial or state | Legislative strength                      | Homicide; Other: Mass shootings |
| Resnick 2017  | Firearm Deaths in America: Can We Learn From 462,000 Lives Lost?                                                                          | Time-trend (population level data, multiple time periods) | United States | Provincial or state | Legislative strength                      | Suicide; Homicide               |
| Sabbath 2020  | State-Level Changes in Firearm Laws and Workplace Homicide Rates: United States, 2011 to 2017                                             | Time-trend (population level data, multiple time periods) | United States | Provincial or state | Legislative strength                      | Homicide                        |
| Tseng 2018    | Firearm legislation, gun violence, and mortality in children and young adults: A retrospective cohort study of 27,566 children in the USA | Cross-sectional (population level data, one time period)  | United States | Provincial or state | Legislative strength                      | Suicide                         |
| Fife 1989     | Firearms' decreased role in New Jersey homicides after a mandatory sentencing law                                                         | Time-trend (population level data, multiple time periods) | United States | Provincial or state | Minimum sentencing law (Graves Amendment) | Suicide; Homicide               |
| Anestis 2015  | Suicide Rates and State Laws Regulating Access and Exposure to Handguns                                                                   | Cross-sectional (population level data, one time period)  | United States | Provincial or state | Multiple laws                             | Suicide                         |
| Anestis 2016  | The associations between state veteran population rates, handgun legislation, and statewide suicide rates                                 | Cross-sectional (population level data, one time period)  | United States | Provincial or state | Multiple laws                             | Suicide                         |
| Anestis 2017  | Handgun Legislation and Changes in Statewide Overall Suicide Rates                                                                        | Cross-sectional (population level data, one time period)  | United States | Provincial or state | Multiple laws                             | Suicide                         |
| Anestis 2019  | Firearm legislation and statewide suicide rates: The moderating role of household firearm ownership levels                                | Cross-sectional (population level data, one time period)  | United States | Provincial or state | Multiple laws                             | Suicide                         |

|               |                                                                                                                                       |                                                           |               |                     |               |                                      |
|---------------|---------------------------------------------------------------------------------------------------------------------------------------|-----------------------------------------------------------|---------------|---------------------|---------------|--------------------------------------|
| Ashworth 2021 | The mitigating effect of low firearm background check requirements on firearm homicides in border states                              | Cross-sectional (population level data, one time period)  | United States | Provincial or state | Multiple laws | Homicide                             |
| Bhatt 2020    | Association of Changes in Missouri Firearm Laws With Adolescent and Young Adult Suicides by Firearms                                  | Time-trend (population level data, multiple time periods) | United States | Provincial or state | Multiple laws | Suicide                              |
| Boor 1990     | Suicide rates, handgun control laws, and sociodemographic variables                                                                   | Time-trend (population level data, multiple time periods) | United States | Provincial or state | Multiple laws | Suicide                              |
| Chien 2020    | The lagged effect of state gun laws on the reduction of state-level firearm homicide mortality in the United States from 1999 to 2017 | Time-trend (population level data, multiple time periods) | United States | Provincial or state | Multiple laws | Homicide                             |
| Choi 2020     | Longitudinal Associations Between Healthcare Resources, Policy, and Firearm-Related Suicide and Homicide from 2012 to 2016            | Cross-sectional (population level data, one time period)  | United States | Provincial or state | Multiple laws | Suicide; Homicide                    |
| Clark 2022    | What factors drive state firearm law adoption? An application of exponential-family random graph models                               | Qualitative study                                         | United States | Provincial or state | Multiple laws | Other: evaluated adoption of laws    |
| Das 2021      | Permissiveness of firearm laws, pro-gun culture, and suicides by firearm in the U.S., 2000-2016                                       | Cross-sectional (population level data, one time period)  | United States | Provincial or state | Multiple laws | Suicide                              |
| Diez 2017     | State Intimate Partner Violence-Related Firearm Laws and Intimate Partner Homicide Rates in the United States, 1991 to 2015           | Cross-sectional (population level data, one time period)  | United States | Provincial or state | Multiple laws | Domestic violence                    |
| Grimsley 2023 | Association of state-level factors with rate of firearm-related deaths                                                                | Cross-sectional (population level data, one time period)  | United States | Provincial or state | Multiple laws | Suicide; Homicide                    |
| Irvin 2014    | Evaluating the effect of state regulation of federally licensed firearm dealers on firearm homicide                                   | Cross-sectional (population level data, one time period)  | United States | Provincial or state | Multiple laws | Homicide                             |
| Kalesan 2016  | Firearm legislation and firearm mortality in the USA: a cross-sectional, state-level study                                            | Cross-sectional (population level data, one time period)  | United States | Provincial or state | Multiple laws | Suicide; Homicide                    |
| Kawano 2023   | Restrictive Firearm Laws and Firearm-Related Suicide                                                                                  | Cross-sectional (population level data, one time period)  | United States | Provincial or state | Multiple laws | Suicide                              |
| Kawano 2023   | State Firearm Laws and Rate of Assault-Related Firearm Death                                                                          | Cross-sectional (population level data, one time period)  | United States | Provincial or state | Multiple laws | Homicide                             |
| Kleck 1993    | The impact of gun control and gun ownership levels on violence rates                                                                  | Cross-sectional (population level data, one time period)  | United States | Municipal           | Multiple laws | Suicide; Homicide; Domestic violence |

|                      |                                                                                                                       |                                                           |               |                     |               |                   |
|----------------------|-----------------------------------------------------------------------------------------------------------------------|-----------------------------------------------------------|---------------|---------------------|---------------|-------------------|
| Knopov 2019          | The Impact of State Firearm Laws on Homicide Rates among Black and White Populations in the United States, 1991-2016  | Time-trend (population level data, multiple time periods) | United States | Provincial or state | Multiple laws | Homicide          |
| Laudon 2024          | Bullet holes: A novel model to identify the most impactful gaps in the firearm homicide prevention laws of each state | Cohort study                                              | United States | Provincial or state | Multiple laws | Homicide          |
| Lee 2017             | Firearm Laws and Firearm Homicides: A Systematic Review                                                               | Systematic review                                         | United States | Federal             | Multiple laws | Homicide          |
| Lester 1982          | The preventive effect of strict gun control laws on suicide and homicide                                              | Cross-sectional (population level data, one time period)  | United States | Provincial or state | Multiple laws | Suicide; Homicide |
| Lester 1988          | Gun control, gun ownership, and suicide prevention                                                                    | Cross-sectional (population level data, one time period)  | United States | Provincial or state | Multiple laws | Suicide; Homicide |
| Leung 2019           | The Association between Firearm Control Policies and Firearm Suicide among Men: A State-Level Age-Stratified Analysis | Cross-sectional (population level data, one time period)  | United States | Provincial or state | Multiple laws | Suicide           |
| Liu 2020             | Neighbors Do Matter: Between-State Firearm Laws and State Firearm-Related Deaths in the U.S., 2000-2017               | Cross-sectional (population level data, one time period)  | United States | Provincial or state | Multiple laws | Suicide; Homicide |
| Liu 2022             | Association of State-Level Firearm-Related Deaths With Firearm Laws in Neighboring States                             | Cross-sectional (population level data, one time period)  | United States | Provincial or state | Multiple laws | Suicide; Homicide |
| Mann 2016            | Prevention of Firearm Suicide in the United States: What Works and What Is Possible                                   | Systematic review                                         | United States | Federal             | Multiple laws | Suicide           |
| Medoff 1983          | Suicides and firearm control laws                                                                                     | Cross-sectional (individual level data, one time period)  | United States | Provincial or state | Multiple laws | Suicide           |
| Morrison 2021        | Firearm Homicide Incidence, Within-state Firearm Laws, and Interstate Firearm Laws in US Counties                     | Cross-sectional (population level data, one time period)  | United States | Provincial or state | Multiple laws | Homicide          |
| Payton 2015          | African American legislators' perceptions of firearm violence prevention legislation                                  | Cross-sectional (individual level data, one time period)  | United States | Provincial or state | Multiple laws | N/A               |
| Ratcliff 2021        | The relationship between state-level dynamics, firearm policies, and county-level homicides                           | Cross-sectional (population level data, one time period)  | United States | Provincial or state | Multiple laws | Homicide          |
| RodriguezAndres 2011 | Gun control and suicide: the impact of state firearm regulations in the United States, 1995-2004                      | Cross-sectional (population level data, one time period)  | United States | Provincial or state | Multiple laws | Suicide           |
| Rosengart 2005       | An evaluation of state firearm regulations and homicide and suicide death rates                                       | Cross-sectional (population level data, one time period)  | United States | Provincial or state | Multiple laws | Suicide; Homicide |

|                        |                                                                                                                                         |                                                           |               |                     |               |                                                                                                                                                        |
|------------------------|-----------------------------------------------------------------------------------------------------------------------------------------|-----------------------------------------------------------|---------------|---------------------|---------------|--------------------------------------------------------------------------------------------------------------------------------------------------------|
| Santaella-Tenorio 2016 | What Do We Know About the Association Between Firearm Legislation and Firearm-Related Injuries?                                         | Systematic review                                         | United States | Not reported        | Multiple laws | Suicide; Homicide                                                                                                                                      |
| Scantling 2023         | Modifiable Factors Related to Firearm Homicides: A Broader View of Our Lane                                                             | Time-trend (population level data, multiple time periods) | United States | Provincial or state | Multiple laws | Homicide                                                                                                                                               |
| Schell 2020            | Changes in firearm mortality following the implementation of state laws regulating firearm access and use                               | Cross-sectional (population level data, one time period)  | United States | Provincial or state | Multiple laws | Suicide; Homicide                                                                                                                                      |
| Sharkey 2023           | The Era of Progress on Gun Mortality: State Gun Regulations and Gun Deaths from 1991 to 2016                                            | Epidemiology                                              | United States | Provincial or state | Multiple laws | Suicide; Homicide                                                                                                                                      |
| Siegel 2019            | The Impact of State Firearm Laws on Homicide and Suicide Deaths in the USA, 1991-2016: a Panel Study                                    | Cross-sectional (population level data, one time period)  | United States | Provincial or state | Multiple laws | Homicide                                                                                                                                               |
| Siegel 2020            | The relation between state gun laws and the incidence and severity of mass public shootings in the United States, 1976-2018             | Cross-sectional (population level data, one time period)  | United States | Provincial or state | Multiple laws | Other: Mass public shootings                                                                                                                           |
| Siegel 2020            | The Impact of State Firearm Laws on Homicide Rates in Suburban and Rural Areas Compared to Large Cities in the United States, 1991-2016 | Cross-sectional (population level data, one time period)  | United States | Provincial or state | Multiple laws | Homicide                                                                                                                                               |
| Sivaraman 2019         | Association of State Firearm Legislation With Female Intimate Partner Homicide                                                          | Cross-sectional (population level data, one time period)  | United States | Provincial or state | Multiple laws | Suicide; Homicide; Domestic violence; Other: Intimate Partner Violence                                                                                 |
| Sivaraman 2020         | State firearm laws, race and law enforcement-related deaths in 16 US states: 2010-2016                                                  | Cross-sectional (population level data, one time period)  | United States | Provincial or state | Multiple laws | Homicide                                                                                                                                               |
| Smart 2023             | Racial and ethnic differences in the effects of state firearm laws: a systematic review subgroup analysis                               | Epidemiology                                              | United States | Provincial or state | Multiple laws | Suicide; Other: violent crime, unintentional injury, defensive gun use, recreational gun use, gun industry outcomes, mass shootings, police shootings. |
| Sommers 1984           | The Effect of Gun Control Laws on Suicide Rates                                                                                         | Cross-sectional (individual level data, one time period)  | United States | Provincial or state | Multiple laws | Suicide                                                                                                                                                |
| Tiderman 2023          | Analyzing the impact of state gun laws on mass shootings in the United States from 2013 to 2021                                         | Time-trend (population level data, multiple time periods) | United States | Provincial or state | Multiple laws | Homicide; Other: mass shootings                                                                                                                        |
| Vigdor 2006            | Do laws restricting access to firearms by domestic violence offenders prevent intimate partner homicide?                                | Time-trend (population level data, multiple time periods) | United States | Federal             | Multiple laws | Domestic violence                                                                                                                                      |
| Webster 2004           | Association between youth-focused firearm laws and youth suicides                                                                       | Cross-sectional (population level data, one time period)  | United States | Provincial or state | Multiple laws | Suicide                                                                                                                                                |

|                |                                                                                                                                                         |                                                           |                       |                     |                    |                                                               |
|----------------|---------------------------------------------------------------------------------------------------------------------------------------------------------|-----------------------------------------------------------|-----------------------|---------------------|--------------------|---------------------------------------------------------------|
| Webster 2020   | Evidence concerning the regulation of firearms design, sale, and carrying on fatal mass shootings in the United States                                  | Cross-sectional (population level data, one time period)  | United States         | Provincial or state | Multiple laws      | Homicide                                                      |
| Willie 2021    | Associations between state intimate partner violence-related firearm policies and injuries among women and men who experience intimate partner violence | Cross-sectional (population level data, one time period)  | United States         | Provincial or state | Multiple laws      | Domestic violence; Other: IPV-related incidents               |
| Zeoli 2008     | Effects of public policies on intimate partner homicide                                                                                                 | Cross-sectional (population level data, one time period)  | United States         | Federal             | Multiple laws      | Homicide                                                      |
| Zeoli 2010     | Effects of domestic violence policies, alcohol taxes and police staffing levels on intimate partner homicide in large US cities                         | Cross-sectional (population level data, one time period)  | United States         | Provincial or state | Multiple laws      | Homicide; Domestic violence                                   |
| Zeoli 2018     | Analysis of the Strength of Legal Firearms Restrictions for Perpetrators of Domestic Violence and Their Associations With Intimate Partner Homicide     | Cross-sectional (population level data, one time period)  | United States         | Federal             | Multiple laws      | Homicide; Domestic violence; Other: Intimate Partner Homicide |
| Anonymous 1989 | Handgun regulations, crime, assaults, and homicide: a tale of two cities                                                                                | Time-trend (population level data, multiple time periods) | United States, Canada | Provincial or state | Multiple laws      | Homicide                                                      |
| Sloan 1988     | Handgun regulations, crime, assaults, and homicide. A tale of two cities                                                                                | Cross-sectional (population level data, one time period)  | United States, Canada | Federal             | Multiple laws      | Homicide                                                      |
| Anestis 2015   | The Association Between State Laws Regulating Handgun Ownership and Statewide Suicide Rates                                                             | Cross-sectional (population level data, one time period)  | United States         | Provincial or state | Permit to purchase | Suicide                                                       |
| Chao 2019      | Impact of licensed federal firearm suppliers on firearm-related mortality                                                                               | Cross-sectional (population level data, one time period)  | United States         | Federal             | Permit to purchase | Suicide; Homicide                                             |
| Gius 2017      | Effects of Permit-to-Purchase Laws on State-Level Firearm Murder Rates                                                                                  | Cross-sectional (population level data, one time period)  | United States         | Provincial or state | Permit to purchase | Homicide                                                      |
| Moe 2020       | Association of Minimum Age Laws for Handgun Purchase and Possession With Homicides Perpetrated by Young Adults Aged 18 to 20 Years                      | Cohort study                                              | United States         | Provincial or state | Permit to purchase | Homicide                                                      |
| Raifman 2020   | State handgun purchase age minimums in the US and adolescent suicide rates: regression discontinuity and difference-in-differences analyses             | Cross-sectional (population level data, one time period)  | United States         | Provincial or state | Permit to purchase | Suicide                                                       |
| Rudolph 2015   | Association Between Connecticut's Permit-to-Purchase Handgun Law and Homicides                                                                          | Cross-sectional (population level data, one time period)  | United States         | Provincial or state | Permit to purchase | Homicide                                                      |



|                   |                                                                                                                                                      |                                                           |               |                     |                                                  |                                                       |
|-------------------|------------------------------------------------------------------------------------------------------------------------------------------------------|-----------------------------------------------------------|---------------|---------------------|--------------------------------------------------|-------------------------------------------------------|
| Webster 2014      | Effects of the repeal of Missouri's handgun purchaser licensing law on homicides                                                                     | Cross-sectional (population level data, one time period)  | United States | Provincial or state | Permit to purchase                               | Homicide                                              |
| Crifasi 2015      | Effects of changes in permit-to-purchase handgun laws in Connecticut and Missouri on suicide rates                                                   | Other                                                     | United States | Provincial or state | Permit-to-purchase (PTP law)                     | Suicide                                               |
| Lundstrom 2023    | Impact of a Permitless Concealed Firearm Carry Law in West Virginia, 1999-2015 and 2016-2020                                                         | Time-trend (population level data, multiple time periods) | United States | Provincial or state | Permitless Concealed Firearm Carry Law (HB 4145) | Suicide; Homicide; Other: unintentional, undetermined |
| Swanson 2017      | Implementation and effectiveness of Connecticut's Risk-based Gun Removal Law: Does it prevent suicides?                                              | Mixed methods                                             | United States | Provincial or state | Risk-based gun removal law                       | Suicide; Homicide                                     |
| Beaver 1993       | Does handgun legislation change firearm fatalities?                                                                                                  | Time-trend (population level data, multiple time periods) | United States | Provincial or state | Saturday Night Special Handgun ban               | Suicide; Homicide                                     |
| Webster 2002      | Effects of Maryland's law banning "Saturday night special" handguns on homicides                                                                     | Time-trend (population level data, multiple time periods) | United States | Provincial or state | Saturday Night Special Handgun ban               | Homicide                                              |
| Goldstein 2022    | Examining the policy effects of Arizona's 2016 pre-emption law on firearm suicide rates in the greater Tucson area: an observational study           | Time-trend (population level data, multiple time periods) | United States | Provincial or state | SB 1487                                          | Suicide                                               |
| Kivisto 2018      | Effects of Risk-Based Firearm Seizure Laws in Connecticut and Indiana on Suicide Rates, 1981-2015                                                    | Cross-sectional (population level data, one time period)  | United States | Provincial or state | Seizure laws                                     | Suicide                                               |
| Saadi 2020        | The impact of gun violence restraining order laws in the U.S. and firearm suicide among older adults: a longitudinal state-level analysis, 2012-2016 | Cohort study                                              | United States | Provincial or state | Seizure laws                                     | Suicide                                               |
| Small 2019        | After the gun: examining police visits and intimate partner violence following incidents involving a firearm                                         | Cohort study                                              | United States | Provincial or state | Seizure laws                                     | Homicide; Domestic violence                           |
| DegliEsposti 2020 | Increasing adolescent firearm homicides and racial disparities following Florida's 'Stand Your Ground' self-defence law                              | Time-trend (population level data, multiple time periods) | United States | Provincial or state | Stand Your Ground                                | Homicide                                              |
| Guettabi 2018     | Stand Your Ground laws, homicides and gun deaths                                                                                                     | Cross-sectional (population level data, one time period)  | United States | Provincial or state | Stand Your Ground                                | Suicide; Homicide                                     |
| Humphreys 2017    | Evaluating the Impact of Florida's "Stand Your Ground" Self-defense Law on Homicide and Suicide by Firearm: An Interrupted Time Series Study         | Time-trend (population level data, multiple time periods) | United States | Provincial or state | Stand Your Ground                                | Suicide; Homicide; Femicide                           |
| Humphreys 2017    | Association Between Enactment of a "Stand Your Ground" Self-defense Law and Unlawful Homicides in Florida                                            | Time-trend (population level data, multiple time periods) | United States | Provincial or state | Stand Your Ground                                | Homicide                                              |
| Levy 2020         | Stand Your Ground: Policy and Trends in Firearm-Related Justifiable Homicide and Homicide in the US                                                  | Cross-sectional (population level data, one time period)  | United States | Provincial or state | Stand Your Ground                                | Homicide                                              |

|                   |                                                                                                                            |                                                           |                       |                     |                          |                   |
|-------------------|----------------------------------------------------------------------------------------------------------------------------|-----------------------------------------------------------|-----------------------|---------------------|--------------------------|-------------------|
| Ukert 2018        | Regional differences in the impact of the "Stand Your Ground" law in Florida                                               | Cross-sectional (population level data, one time period)  | United States         | Provincial or state | Stand Your Ground        | Homicide          |
| DegliEsposti 2022 | Analysis of "Stand Your Ground" Self-defense Laws and Statewide Rates of Homicides and Firearm Homicides                   | Time-trend (population level data, multiple time periods) | United States         | Provincial or state | Stand Your Ground        | Homicide          |
| Dunton 2021       | The Association Between Repealing the 48-Hour Mandatory Waiting Period on Handgun Purchases and Suicide Rates in Wisconsin | Time-trend (population level data, multiple time periods) | United States         | Provincial or state | Waiting period laws      | Suicide           |
| Luca 2017         | Handgun waiting periods reduce gun deaths                                                                                  | Time-trend (population level data, multiple time periods) | United States         | Provincial or state | Waiting period laws      | Suicide; Homicide |
| Oliphant 2022     | Effects of Wisconsin's handgun waiting period repeal on suicide rates                                                      | Cross-sectional (population level data, one time period)  | United States         | Provincial or state | Waiting period laws      | Suicide           |
| Kwon 1997         | The effectiveness of gun control laws: multivariate statistical analysis                                                   | Cross-sectional (population level data, one time period)  | United States, Canada | Federal             | Brady Bill               | Suicide; Homicide |
| Rich 1990         | Guns and suicide: possible effects of some specific legislation                                                            | Time-trend (population level data, multiple time periods) | United States, Canada | Provincial or state | Firearms possession laws | Suicide           |
| Sloan 1990        | Firearm regulations and rates of suicide. A comparison of two metropolitan areas                                           | Cross-sectional (population level data, one time period)  | United States, Canada | Provincial or state | Firearms possession laws | Suicide           |
